# Supplementary material for: Immune Phenotypes and Target Antigens of Clonally Expanded Bone Marrow T Cells in Treatment-Naïve Multiple Myeloma
Source: PubMed Central journal article supplement — Cancer Immunol Res. 2022 Sep 19;10(11):1407–19. doi: 10.1158/2326-6066.CIR-22-0434 (PMC9627264; doi:10.1158/2326-6066.cir-22-0434), 2022-09-19
Supplement: cir-22-0434_supplementary_tables_and_figures_suppst1-st9_sf1-sf17.pdf [file cir-22-0434_supplementary_tables_and_figures_suppst1-st9_sf1-sf17.pdf]

**SUPPLEMENTARY TABLES****Supplementary Table S1**

| <i>Patient</i> | <i>Genetic characteristics</i>                                             |
|----------------|----------------------------------------------------------------------------|
| MM195          | n.d.                                                                       |
| MM104          | n.d.                                                                       |
| MM078          | Gain of 11q23                                                              |
| MM165          | Gain of 8q24 (MYC), 9q34, 11q23, 19q13, 15q22, 1q21.                       |
| MM061          | Deletion of 13q14. Gain of 9q34. IGH/CCND1 fusion (1-2 fusion signals).    |
| MM112          | n.d.                                                                       |
| MM204          | IGH/CCND1 fusion, subclone with IGH translocation with an unknown partner. |
| MM008          | n.d.                                                                       |
| MM003          | Gain of 9q34, 11q23, 19q13, 15q22                                          |
| MM157          | IGH/CCND1 fusion. MYC rearrangement                                        |
| MM050          | Deletion of 13q14. Gain of MYC, 9q34, 11q23, 15q22, 19q13                  |
| MM139          | Deletion of 1p32. Gain of 9q34, 11q23, 15q22, 19q13                        |
| MM160          | Gain of 1q21, 9q34, 11q23, 15q22, 17p13, 19q13. Deletion of 13q14          |

**Supplementary Table S1. Genetic characteristics of the study cohort.**

Genetic characteristics were determined as part of routine clinical diagnostics by fluorescence in situ hybridization. n.d. indicates not determined.

**Supplementary Table S2**

| <i>Target</i>     | <i>Clone</i> | <i>Fluorescent dye</i> | <i>Vendor</i>  | <i>RRID/Cat.No.</i> |
|-------------------|--------------|------------------------|----------------|---------------------|
| CD8               | RPA-T8       | BV510                  | BioLegend      | AB_2561942          |
| CD57              | HCD574       | FITC                   | BioLegend      | Cat.No. 322306      |
| PD-1              | EH12.2H7     | PerCP-Cy5.5            | BioLegend      | AB_1595461          |
| BTLA              | J168-570     | PE-CF594               | BD Biosciences | AB_2738960          |
| TCR $\alpha\beta$ | IP26         | APC                    | BioLegend      | AB_10612569         |
| CD45RA            | HI100        | AF700                  | BioLegend      | AB_493763           |
| CD38              | HIT2         | PE-Cy7                 | BioLegend      | AB_2072782          |
| CD39              | A1           | PE-Cy7                 | BioLegend      | AB_2099950          |
| CD25              | CD25-4E3     | PE-Cy7                 | eBioscience    | AB_2573336          |
| CTLA-4            | BNI3         | PE                     | BioLegend      | AB_2566796          |
| CCR7              | G043H7       | BV650                  | BioLegend      | AB_2563867          |
| CD28              | CD28.2       | BV421                  | BioLegend      | AB_2561910          |
| TIM-3             | 7D3          | BV711                  | BD Biosciences | AB_2744370          |
| CD4               | SK3          | APC-Fire750            | BioLegend      | AB_2572097          |
| Live/dead         |              | Zombie Yellow          | BioLegend      | Cat.No. 423103      |

**Supplementary Table S2. Antibodies for FACS index sorting.**

APC indicates allophycocyanin; BV, Brilliant Violet; FITC, fluorescein isothiocyanate; PerCP, peridinin chlorophyll; Cy, cyanine; PE, phycoerythrin; AF, Alexa Fluor; and n.a., not available.

## Supplementary Table S3

| Patient | TCR             | TRAV        | CDR3 $\alpha$ amino acid sequence | TRAJ  | TRBV    | CDR3 $\beta$ amino acid sequence | TRBJ   | Expressed in     |           |
|---------|-----------------|-------------|-----------------------------------|-------|---------|----------------------------------|--------|------------------|-----------|
|         |                 |             |                                   |       |         |                                  |        | 58 $\alpha\beta$ | Human PBL |
| MM008   | 15C7            | 14/DV4*02   | CAMREEMDSSYKLIF                   | 12*01 | 9*01    | CASSLRRGGPLQETQYF                | 2-5*01 | Yes              | No        |
| MM008   | 15F10           | 21*01       | CAVKGGSGTYKYIF                    | 40*01 | 13*01   | CASTLQGLPSYEQYF                  | 2-7*01 | Yes              | No        |
| MM008   | 14F10           | 9-2*01      | CALSYGNRLAF                       | 7*01  | 6-5*01  | CASRSRVSKTEAFF                   | 1-1*01 | Yes              | No        |
| MM008   | 15D7            | 8-6*01      | CAALYNQGGKLIF                     | 23*01 | 7-6*01  | CASSSGGDYEQYF                    | 2-7*01 | Yes              | No        |
| MM008   | 11D7            | 12-2*01     | CAVPTSVDKVI                       | 50*01 | 25-1*01 | CASQTGGQSEQFF                    | 2-1*01 | Yes              | No        |
| MM008   | 14E10           | 20*01       | CAVQPGGSYIPTF                     | 6*01  | 3-1*01  | CASSEGDYEQYF                     | 2-7*01 | Yes              | No        |
| MM008   | 15E10           | 17*01       | CATVTRMDSSYKLIF                   | 12*01 | 7-9*01  | CASSLIGISSYNEQFF                 | 2-1*01 | Yes              | No        |
| MM008   | 15B1            | 20*01       | CAVQAGRDSNYQLIW                   | 33*01 | 19*01   | CASKVGGHSSTEAFF                  | 1-1*01 | Yes              | No        |
| MM008   | 11F4            | 24*01       | CAPSYSGAGSYQLTF                   | 28*01 | 4-2*01  | CASSPTESTGTYEYF                  | 2-7*01 | Yes              | No        |
| MM008   | 11B3            | 14/DV4*02   | CAMRGEMDSSYKLIF                   | 12*01 | 9*01    | CASSPRRGGPVSETQYF                | 2-5*01 | Yes              | No        |
| MM008   | 13A6            | 25*01       | CAGPPIAGANLFF                     | 36*01 | 5-1*01  | CASSLVGRGQNEQFF                  | 2-1*01 | Yes              | No        |
| MM008   | 15G9            | 24*01       | CALGYTGGFKTIF                     | 9*01  | 3-1*01  | CASSHTMMSPLPYSYEQYF              | 2-7*01 | Yes              | No        |
| MM008   | 12H5            | 19*01       | CALGPGSARQLTF                     | 22*01 | 27*01   | CASSVGPANWTEAFF                  | 1-1*01 | Yes              | No        |
| MM050   | 11B7 $\alpha$ 1 | 12-2*01     | CAVSYNFKFYF                       | 21*01 | 5-6*01  | CASSLLEEQFF                      | 2-1*01 | Yes              | Yes       |
| MM050   | 11B7 $\alpha$ 2 | 12-1*01     | CVVNKNYGGSQNLIF                   | 42*01 | 5-6*01  | CASSLLEEQFF                      | 2-1*01 | Yes              | Yes       |
| MM050   | 1B3 $\alpha$ 1  | 38-2/DV8*01 | SAGNMLTF                          | 39*01 | 2*01    | CASSWDGGSRDQPQHF                 | 1-5*01 | No               | Yes       |
| MM050   | 1B3 $\alpha$ 2  | 38-2/DV8*01 | CASLFTGNQFYF                      | 49*01 | 2*01    | CASSWDGGSRDQPQHF                 | 1-5*01 | Yes              | Yes       |
| MM050   | 2D12            | 38-2/DV8*01 | CAYRSSGDMRF                       | 43*01 | 6-5*01  | CASSPGTTPRDTQYF                  | 2-3*01 | Yes              | Yes       |
| MM050   | 2E4             | 12-1*01     | CVVTSGNTPLVF                      | 29*01 | 10-1*01 | CASSDLEEGPTDTQYF                 | 2-3*01 | Yes              | Yes       |
| MM050   | 2B3             | 20*01       | CAVQAPIQGAQKLVF                   | 54*01 | 4-1*01  | CASSQVTRADIQYF                   | 2-4*01 | Yes              | Yes       |
| MM050   | 2H5             | 8-6*01      | CAVSNMNTGFQKLVF                   | 8*01  | 7-8*01  | CASSLGGAGTGDTQYF                 | 2-3*01 | Yes              | Yes       |
| MM050   | 2B4             | 19*01       | CALGTGGGNKLT                      | 10*01 | 4-2*01  | CASSQEVAGVQETQYF                 | 2-5*01 | Yes              | Yes       |
| MM050   | 3D6             | 14/DV4*02   | CAILTLTGASKLTF                    | 44*01 | 5-6*01  | CASSTHRDIESYEQYF                 | 2-7*01 | Yes              | Yes       |
| MM050   | 2C8             | 38-2/DV8*01 | CAYSGGGADGLTF                     | 45*01 | 6-2*01  | CASSYDLRGTQYF                    | 2-5*01 | Yes              | Yes       |
| MM139   | 10F5            | 1-2*01      | CAVIGEDDKIIF                      | 30*01 | 7-8*01  | CASSSRSTGELFF                    | 2-2*01 | Yes              | Yes       |
| MM139   | 10G9            | 1-1*01      | CAVPGDSSYKLIF                     | 12*01 | 10-3*01 | CAISESGTVNTEAFF                  | 1-1*01 | Yes              | Yes       |
| MM139   | 10D7            | 38-2/DV8*01 | CAYREGGAQKLVF                     | 54*01 | 19*01   | CASSIGRRGNQPQHF                  | 1-5*01 | Yes              | Yes       |
| MM139   | 10H7            | 19*01       | CALRSSNTGKLIF                     | 37*02 | 4-1*01  | CASSQEMGSNQPQHF                  | 1-5*01 | Yes              | Yes       |
| MM139   | 10F7            | 12-1*01     | CVVNIPANTGGFKTIF                  | 9*01  | 10-2*01 | CASSPGTGTGYTF                    | 1-2*01 | Yes              | Yes       |
| MM139   | 10F3            | 35*01       | CAGSGSLQGAQKLVF                   | 54*01 | 19*01   | CASRGTGTGSSYEQYF                 | 2-7*01 | Yes              | Yes       |
| MM139   | 6C1             | 5*01        | CALRFGNEKLT                       | 48*01 | 29-1*01 | CSTRDDNYEQYF                     | 2-7*01 | Yes              | Yes       |
| MM139   | 10G1            | 17*01       | CATGFSGQKLLF                      | 16*01 | 27*01   | CASSPRAGGSNYGYTF                 | 1-2*01 | No               | Yes       |
| MM139   | 10B5            | 24*01       | CAFSTGTASKLTF                     | 44*01 | 12-3*01 | CASSLARPEAPLHF                   | 1-6*02 | Yes              | Yes       |
| MM139   | 10F4            | 1-2*01      | CAVRDNDYKLSF                      | 20*01 | 6-1*01  | CASSQLGGEGTDTQYF                 | 2-3*01 | Yes              | Yes       |
| MM139   | 7D2             | 12-2*01     | CAVGDSNYQLIW                      | 33*01 | 6-5*01  | CASSYSGGGYEQYF                   | 2-7*01 | Yes              | Yes       |
| MM157   | 11A5            | 17*01       | CATEGDFGNEKLT                     | 48*01 | 15*02   | CATSSHGGGETQYF                   | 2-5*01 | Yes              | No        |

|       |        |           |                    |       |         |                      |        |     |    |
|-------|--------|-----------|--------------------|-------|---------|----------------------|--------|-----|----|
| MM157 | 11D1α1 | 34*01     | CGADNGSGYSTLTF     | 11*01 | 28*01   | CASLELAGEDYEQYF      | 2-7*01 | Yes | No |
| MM157 | 11D1α2 | 21*01     | CAVPSGGYNKLIF      | 4*01  | 28*01   | CASLELAGEDYEQYF      | 2-7*01 | Yes | No |
| MM157 | 12G9   | 14/DV4*02 | CAMREEEDNAGNMLTF   | 39*01 | 7-6*01  | CASSLGWSTQYF         | 2-5*01 | Yes | No |
| MM157 | 13D8   | 14/DV4*02 | CAITQRYNAGNMLTF    | 39*01 | 12-3*01 | CASSFSPGRTNTEAFF     | 1-1*01 | Yes | No |
| MM157 | 12D1   | 12-2*01   | CAVTGANNLFF        | 36*01 | 7-8*01  | CASSLSLSYEQYF        | 2-7*01 | Yes | No |
| MM157 | 12E1   | 27*01     | CATAGTYKYIF        | 40*01 | 5-5*01  | CASSPATEGIQYF        | 2-4*01 | Yes | No |
| MM157 | 13B10  | 21*01     | CAVTQFAYSAGSYQLTF  | 28*01 | 28*01   | CASSDPGQNGTGELFF     | 2-2*01 | Yes | No |
| MM157 | 11D7   | 29/DV5*01 | CAASLDYKLSF        | 20*01 | 27*01   | CASSFGMGTDQYF        | 2-3*01 | Yes | No |
| MM157 | 13G1α1 | 27*01     | CAGAKDAGNMLTF      | 39*01 | 7-9*01  | CASSLIGVSSYNEQFF     | 2-1*01 | Yes | No |
| MM157 | 13G1α2 | 17*01     | CATVVRMDSSYKLIF    | 12*01 | 7-9*01  | CASSLIGVSSYNEQFF     | 2-1*01 | Yes | No |
| MM157 | 11E6   | 35*01     | CAGQLLYSGAGSYQLTF  | 28*01 | 27*01   | CASRALAEYNEQFF       | 2-1*01 | Yes | No |
| MM157 | 13E11  | 29/DV5*01 | CAASADYKLSF        | 20*01 | 27*01   | CASSFGQGADTQYF       | 2-3*01 | Yes | No |
| MM157 | 11H9   | 14/DV4*02 | CAMREGGVNRDDKIIF   | 30*01 | 2*01    | CASRITETLSYEQYF      | 2-7*01 | Yes | No |
| MM157 | 13D3   | 10*01     | CVVTGRMDSSYKLIF    | 12*01 | 7-9*01  | CASSLLGEGRQYEQYF     | 2-7*01 | Yes | No |
| MM157 | 13C2   | 3*01      | CAVRDRSSRDNYGQNFVF | 26*01 | 4-1*01  | CASSQELAWTYEQYF      | 2-7*01 | Yes | No |
| MM157 | 11A11  | 29/DV5*01 | CAASAGGNKLVF       | 47*01 | 2*01    | CASSTRDEQYF          | 2-7*01 | Yes | No |
| MM157 | 12H4   | 19*01     | CALSEAESGGSYIPTF   | 6*01  | 7-6*01  | CASSFLVGLLEADTQYF    | 2-3*01 | Yes | No |
| MM157 | 12G1   | 5*01      | CAETPLDKIIF        | 30*01 | 14*01   | CASRAATYNEQFF        | 2-1*01 | Yes | No |
| MM160 | 16C6   | 14/DV4*02 | CAMREPPNRNNNARLMF  | 31*01 | 7-7*01  | CASSLAGAGGNEQFF      | 2-1*01 | Yes | No |
| MM160 | 16A9   | 19*01     | CALSPRGGADGLTF     | 45*01 | 19*01   | CASSIEGSSYNEQFF      | 2-1*01 | Yes | No |
| MM160 | 16H9   | 8-2*01    | CAVRPNFGNEKLTF     | 48*01 | 20-1*01 | CSACVIRTSGQPSSTDTQYF | 2-3*01 | Yes | No |
| MM160 | 16A2   | 19*01     | CALSEPGGGADGLTF    | 45*01 | 28*01   | CASSLLAEYNEQFF       | 2-1*01 | Yes | No |
| MM160 | 16F6   | 34*01     | CGADMDSNSGYALNF    | 41*01 | 20-1*01 | CSASEVEGAFEHSSYNEQFF | 2-1*01 | Yes | No |
| MM160 | 16F10  | 19*01     | CALSEAWNAGNMLTF    | 39*01 | 13*01   | CASSPDGPGLDYGYTF     | 1-2*01 | Yes | No |
| MM160 | 18G9   | 19*01     | CALSEEGSEKLVF      | 57*01 | 28*01   | CASTEETPNEKLFF       | 1-4*01 | Yes | No |
| MM160 | 17G7   | 16*01     | CALSGRTGFQKLVF     | 8*01  | 7-9*01  | CASSAPRTLQAGTSYEQYF  | 2-7*01 | Yes | No |
| MM160 | 17C11  | 19*01     | CALSVGTSYGKLTTF    | 52*01 | 19*01   | CASSILPGGSYEQYF      | 2-7*01 | Yes | No |
| MM160 | 16D10  | 19*01     | CALSEASGYGGSQGNLIF | 42*01 | 19*01   | CASSTLPGQFYEQYF      | 2-7*01 | Yes | No |
| MM160 | 18A12  | 19*01     | CALSDNYGQNFVF      | 26*01 | 19*01   | CASSTLPGQGARLGTYF    | 1-2*01 | Yes | No |
| MM160 | 17C6   | 4*01      | CLVGDLSSTGKLIF     | 37*02 | 28*01   | CASSWGYGYTF          | 1-2*01 | Yes | No |
| MM160 | 17D1   | 26-2*01   | CILRADSNYQLIW      | 33*01 | 2*01    | CASSYGQFGESYEQYF     | 2-7*01 | Yes | No |
| MM160 | 16E5   | 9-2*01    | CALRPYNQGGKLIF     | 23*01 | 30*01   | CAWSFTGEGYGYTF       | 1-2*01 | Yes | No |

### Supplementary Table S3. Re-expressed TCRs of dominant T cell clones.

TRAV indicates TCRα V-gene and allele; TRAJ, TCRα J-gene and allele; TRBV, TCRβ V-gene and allele; TRBJ, TCRβ J-gene and allele; and PBL, peripheral blood lymphocytes.

**Supplementary Table S4**

| <i>Patient</i> | <i>TCR-recombinant 58<math>\alpha\beta</math><sup>-</sup><br/>(cell number)</i> | <i>CD38-enriched BM,<br/>(cell number)</i> | <i>CD38-depleted BM,<br/>(cell number)</i> | <i>TCR-transduced human<br/>PBL (cell number)</i> |
|----------------|---------------------------------------------------------------------------------|--------------------------------------------|--------------------------------------------|---------------------------------------------------|
| MM008          | 60 000                                                                          | 100 000                                    | 100 000                                    | -                                                 |
| MM050          | 60 000                                                                          | 100 000                                    | 100 000                                    | 100 000                                           |
| MM139          | 60 000                                                                          | 100 000                                    | 100 000                                    | 100 000                                           |
| MM157          | 60 000                                                                          | 100 000                                    | 100 000                                    | -                                                 |
| MM160          | 60 000                                                                          | 100 000                                    | 100 000                                    | -                                                 |

**Supplementary Table S4. Cell numbers for incubation of TCR-recombinant cells with CD38-enriched and CD38-depleted bone marrow cells.**

Co-incubations were done in 96-well plates in a final volume of 150  $\mu$ L RPMI1640 including 10% fetal bovine serum and 100 U/mL penicillin and 100  $\mu$ g/mL streptomycin for 16 hours at 37 °C and 5% CO<sub>2</sub>. From patients MM139 and MM50, identical TCRs that were expressed in 58 $\alpha\beta$ <sup>-</sup> were also expressed in healthy donor human peripheral blood lymphocytes (PBL). Cell numbers of PBL indicate absolute numbers expressing the recombinant TCR determined by mouse TCR $\beta$  constant region staining and flow cytometry. BM indicates bone marrow.

**Supplementary Table S5**

| <i>Patient</i> | <i>CD38-depleted BM</i> | <i>CD38-enriched BM</i> |
|----------------|-------------------------|-------------------------|
| MM008          | 0.4                     | 38.5                    |
| MM050          | 0.9                     | 73.8                    |
| MM139          | 15.1                    | 83.2                    |
| MM157          | 6.9                     | 88.6                    |
| MM160          | 23.4                    | 87.8                    |

**Supplementary Table S5. Frequencies of CD38<sup>++</sup>CD138<sup>+</sup> multiple myeloma cells after magnetic enrichment.**

Percentages of CD38<sup>++</sup>CD138<sup>+</sup> among all nucleated cells were determined by flow cytometry. BM indicates bone marrow.

**Supplementary Table S6**

| <i>Patient</i> | <i>TCR</i>      | <i>TRAV</i> | <i>CDR3<math>\alpha</math> amino acid sequence</i> | <i>TRAJ</i> | <i>TRBV</i> | <i>CDR3<math>\beta</math> amino acid sequence</i> | <i>TRBJ</i> | <i>Target peptide</i> | <i>Label</i> | <i>Derived protein</i> |
|----------------|-----------------|-------------|----------------------------------------------------|-------------|-------------|---------------------------------------------------|-------------|-----------------------|--------------|------------------------|
| MM008          | 15E10           | 17*01       | CATVTRMDSSYKLIF                                    | 12*01       | 7-9*01      | CASSLIGISSYNEQFF                                  | 2-1*01      | TPRVTGGGAM            | TPR          | CMV pp65 (417-426)     |
| MM139          | 10F7            | 12-1*01     | CVVNIPANTGGFKTIF                                   | 9*01        | 10-2*01     | CASSPGTGTGYGYTF                                   | 1-2*01      | VTEHDTLLY             | VTE          | CMV pp50 (245-253)     |
| MM157          | 13G1 $\alpha$ 2 | 17*01       | CATVVRMDSSYKLIF                                    | 12*01       | 7-9*01      | CASSLIGVSSYNEQFF                                  | 2-1*01      | TPRVTGGGAM            | TPR          | CMV pp65 (417-426)     |

**Supplementary Table S6. CMV peptide-specific TCRs.**

TRAV indicates TCR $\alpha$  V-gene and allele; TRAJ, TCR $\alpha$  J-gene and allele; TRBV, TCR $\beta$  V-gene and allele; TRBJ, TCR $\beta$  J-gene and allele.

**Supplementary Table S7**

| <i>Gene</i> | <i>Patient and mutation</i> |              |              |              |              |              |              |              |              |
|-------------|-----------------------------|--------------|--------------|--------------|--------------|--------------|--------------|--------------|--------------|
|             | <i>MM061</i>                | <i>MM165</i> | <i>MM112</i> | <i>MM003</i> | <i>MM008</i> | <i>MM157</i> | <i>MM050</i> | <i>MM139</i> | <i>MM160</i> |
| KRAS        |                             | G12R         |              | G12C         | G13D         |              |              | G12D         |              |
| CGREF1      |                             |              |              |              | E249K        | E249K        |              | E249K        | E249K        |
| IgLL5       |                             |              |              |              | V43A         |              |              | L39M         | M42K         |
| ANK2        |                             |              |              |              |              | Q641E        | P1684Q       |              |              |
| LRP1B       |                             |              |              | I3739V       |              |              | C4398S       |              |              |
| FAT4        |                             |              |              | L2703F       | H4446P       |              |              |              |              |
| PCDHA6      | S434L                       |              |              | S608L        |              |              |              |              |              |
| CEACAM19    |                             |              |              | R111H        | D62N         |              |              |              |              |
| ATRX        |                             |              |              |              |              |              | E1017K       |              | K1956T       |
| TTN         |                             |              |              |              |              |              | L4994H       |              | T8725N       |
| NRAS        |                             |              |              |              |              | Q61K         | Q61R         |              |              |
| RELN        |                             |              | M2699R       |              |              |              |              | S2102P       |              |
| SIAH2       |                             |              |              | K139N        |              |              |              | H25Y         |              |
| FAM46C      |                             |              |              |              |              |              | N352T        | Y356H        |              |
| CD83        | S2L                         |              |              | V31A         |              |              |              |              |              |
| MTMR4       |                             |              |              | S367G        |              |              | F484L        |              |              |

**Supplementary Table S7. Mutation details of genes mutated in multiple patients.**

Details on genes carrying somatic mutations in at least two patients determined by whole exome sequencing of CD38-enriched multiple myeloma cells.



**Supplementary Table S8**

| <i>Patient</i> | <i>Mutation</i> | <i>Mutated peptide</i> | <i>Peptide label</i> | <i>Predicted HLA binding</i> | <i>Affinity (nM)</i> | <i>Rank (%)</i> |
|----------------|-----------------|------------------------|----------------------|------------------------------|----------------------|-----------------|
| MM008          | RNF168:M20I     | CiEILVEPV              | CIE                  | A*01:01                      | 6519.1               | 1.9             |
| MM008          | PCDHGA3:Y402C   | cRLVTATSL              | CRL                  | C*07:02                      | 3847.0               | 1.2             |
| MM008          | HMMR:N12S       | FsDPSGCAPSPGAY         | FSD                  | A*01:01                      | 13.5                 | 0.02            |
| MM008          | PCMTD1:K325T    | tPEEPPQNL              | TPE                  | B*07:02                      | 971.2                | 1.7             |
| MM008          | KRAS:G13D       | VVVGAGdVGK             | VVV                  | A*03:01                      | 936.8                | 1.9             |
| MM008          | KDM2B:R609H     | ARRhRTRCR              | ARR                  | C*07:01                      | 354.0                | 0.175           |
| MM008          | BRCA1:T1661I    | LiASTERVnk             | LIA                  | A*03:01                      | 116.2                | 0.5             |
| MM008          | URB1:R409Q      | qAFQTREFI              | QAF                  | C*07:01                      | 1861.8               | 0.7             |
| MM008          | IGLL5:V43A      | RPMaAPQSG              | RPM                  | B*07:02                      | 131.2                | 0.5             |
| MM008          | TBX22:I92F      | KDfQMELQGSELWK         | KDF                  | A*03:01                      | 877.3                | 1.8             |
| MM160          | PPP1R15B:K80M   | mVLIWSQLF              | MVL                  | A*23:01                      | 35.2                 | 0.15            |
| MM160          | PPP1R15B:K80M   | LPGLLQmVLI             | LPG                  | B*51:01                      | 192.1                | 0.03            |
| MM160          | PPP1R15B:K80M   | LQmVLIWSQL             | LQM                  | A*02:01                      | 135.1                | 1.3             |
| MM160          | SACS:Y4119F     | LISDTSfLI              | LIS                  | A*02:01                      | 28.1                 | 0.4             |
| MM160          | COPZ2:R85W      | KTSwTESEI              | KTS                  | C*15:02                      | 211.9                | 0.2             |
| MM160          | COPZ2:R85W      | SwTESEIAFF             | SWT1                 | A*23:01                      | 111.3                | 0.4             |
| MM160          | COPZ2:R85W      | SwTESEIAFFGGM          | SWT2                 | B*44:03                      | 502.1                | 0.7             |
| MM160          | CHST7:D155G     | gMLRSLFRCDFSV          | GML                  | A*02:01                      | 54.8                 | 0.7             |
| MM160          | SLC25A43:M111V  | HISQWSSiv              | HIS                  | C*15:02                      | 343.5                | 0.3             |
| MM160          | SLC25A43:M111V  | IvAGSLAGMV             | IVA                  | A*02:01                      | 473.1                | 3               |
| MM160          | FBXL12:H226Q    | TLLAISRqL              | TLL                  | A*02:01                      | 349.9                | 2.5             |
| MM160          | HOOK2:R219Q     | QENAGLqERM             | QEN                  | B*44:03                      | 1058.8               | 1.1             |

**Supplementary Table S8. Mutation-derived peptides and potential HLA-binding.**

From patients in whom re-expressed TCRs recognized CD38-enriched multiple myeloma cells, all mutation-derived peptides that were predicted to be presented on HLA were synthesized to test recognition by selected TCRs. Mutated amino acids are marked as lowercase letters. Potential HLA binding, affinity, and %Rank were determined using NetMHC 4.0 (<http://www.cbs.dtu.dk/services/NetMHC/>). Peptides with an affinity  $\leq 1000$  nM and/or %Rank  $\leq 2$  were considered binders and synthesized.

## Supplementary Table S9

|            |            |             |             |            |
|------------|------------|-------------|-------------|------------|
| SPYPGLRLI  | IPAIRDITL  | SPOQKLVIV   | LARPAALLL   | RPFHGWTSL  |
| IPYPRPIHL  | SPYQNIKIL  | VPRPPQTSL   | APWLQIQLL   | SPRVPNSSV  |
| LPQPVPLSV  | MPPRPETFL  | RPPPIGAEV   | RPRPTEATV   | SPSDRPLSL  |
| YPHSPGQVI  | LPAPKWTEL  | SPRPKMDAI   | APVLPHTAV   | VPFSVPKIPL |
| LPFKYPAVL  | VPREPPVSL  | RPVVQLTAI   | APIERVKLL   | VPASFRLQM  |
| LPHLPSLEI  | IPPPPPAM   | IPAKPPVSF   | IEPFSSPPEL  | RPQDKFLVL  |
| LPYSVGRVL  | TPHQTFVRL  | RPFKLRIL    | QPNQLPLRL   | SPRWVVPVL  |
| IPRSITVLV  | VPYLRDLGL  | MPYSNGRPAL  | SAIPHPLIM   | SPKVFPPLSL |
| FPRLPPASV  | LPRQPPMSL  | FPRLDTKL    | RPVMPSRQI   | MPKKDARTL  |
| LPFLRITSL  | LPHNRLVSL  | LPHAPGVQM   | FPSLREAAAL  | NPRIPYTEL  |
| IPALRDISI  | YPAQITPKM  | VPSKPPMSL   | TPRPTAAEL   | VPPEARPAL  |
| IPFSNPRVL  | FPREPRPKL  | YPFKPPKVAF  | APASVHSEI   | APSPPPAPV  |
| LPFGPFKEL  | SPVKSTTSI  | SPFHRLNFL   | APAPTAVVL   | QPASFAVSL  |
| LPLPNFSSL  | VPRVPTHHL  | LSPKPSSTL   | SPNSKVNTL   | RPYSPGAVL  |
| SPYLRPLTL  | LPRPPPEM   | NPSTVTEL    | SPAPTHNSL   | HASDRIAL   |
| IPYKPNYSL  | IPKPLNPAL  | FPRFGGSLAL  | VAIKAGTTL   | HPINPRVAL  |
| LPHVPLGVI  | RPRPPVLSV  | HRVPSLTTV   | SPYPTKTQTM  | RPHVAQPTL  |
| QPRPPVTLI  | TPAPVPTSL  | RPMIILQI    | SPMSQRPVL   | SAVGHVFSL  |
| LPAPPHIDV  | SPYPGLRL   | APSPVIPRL   | RPDLRMAAI   | MPSQFRDIL  |
| MPSPVSPKL  | SPSPPSVAV  | NPQERTLTL   | VPRIQPQSL   | IPMGPPRLPL |
| RPYHTIIEI  | LKQPPLML   | LPSALRPLL   | VPPPPHRPL   | VARPLSTAL  |
| SPAPPPPAV  | SPHGHLVL   | VPVPPNVAF   | NPASKVIAL   | TPSPARPAL  |
| MPRGVVVTL  | IPRLIVSQL  | RPRAPIAV    | APFLRNVEL   | LPAPWPHRGL |
| SPRPPLISV  | RPYKPVVLL  | RPSWVPAL    | VPAEPKLAFL  | TPRGGVGSV  |
| IPNERTMQL  | MPALRSINL  | IPAKLHNSL   | IPYHSEVPVSL | SAMKAVTEL  |
| FAYMPNNSL  | LPPPHVPL   | SPKPMVSL    | APIGVHPSL   | LAMRPLASL  |
| TPMGPGRTV  | TAAPVPTTL  | IPRPVDGVEV  | RPISDFTL    | MPPAFPRLEL |
| RPAPPPPTV  | MPARWLTHL  | SPQRLIYL    | SPSSILSTL   | KPIQRTILM  |
| SPQGRVMTI  | RPKPIITSV  | IPAEGRYAL   | HPRSPNVLSV  | APRDNVTLL  |
| LPWPARPAL  | RSPPPVQSV  | APVYLAIVI   | APVIRPII    | SPLTKSISL  |
| RPMPGTHTV  | MPKPNLIM   | HRDPNLLL    | APTLPAAVI   | HRAPAVLL   |
| IPLPRLAM   | LPAPPTQNM  | RPRPITLL    | MPALRPAL    | APSPRPLSL  |
| FPSMPSRPL  | FPNIPGKSL  | WPMEGSHWL   | TPAVGRLEV   | RPRPGNILL  |
| QPITPGPSI  | IPMTPTSSF  | LPYLPSGESL  | IARLPSSTL   | APHLVGPPL  |
| RPFPGLVI   | FPHPVNQVTF | SPHAATAL    | LPRPPMALLAL | SPRPGPSSL  |
| NPRSVTLI   | SPRDPVTL   | LPSLRILYM   | YPKRPLLGL   | FPRFGGSL   |
| RPFERIMQL  | IPLKPSNEL  | KPRPIIPL    | AAYLRALS    | APRPGLLSL  |
| RPFERTITM  | MARPQGSSV  | KPRPVSQLV   | LPKATILD    | APEEHPVLL  |
| SPKPWIPVL  | SPAPTITSL  | RPILTIITL   | NAINITSAL   | GPLPRTVEL  |
| VPRPIFSQL  | TPSEPHVPL  | RPAPHPLFL   | RPQPWIRM    | SPQAPTHFL  |
| LPRLTTPVL  | LPKPPGRGV  | RPVPPPPSL   | APYSRPKQL   | RPAGAVVTL  |
| LPAPKGPAL  | SPPWRLIAV  | VPRPPATL    | SPRYIFTML   | YPRTGGTL   |
| IPYTGPFNLL | RPAEVRLLI  | FASFPHMVL   | NPASPPLSL   | RPAGPALLL  |
| LPRPVQNL   | LPQGIVREL  | TPKMPGQSV   | SPISHFLDL   | SPASRSISL  |
| LPSFLRAL   | TPAPPTHAL  | VPRLPGETL   | TPFGGRLVL   | SPKLPVSSL  |
| VPHGHITSL  | HPRSPPTTL  | SPMEVGKKL   | SPNAEIHIL   | GPPPPGPIL  |
| SPKPVSVTV  | SPWKPPTYL  | APRLMITHI   | RPYKPVVL    | TPETVRMVL  |
| SPLSSHVVV  | APAPPSKVI  | QPRYPVNSV   | LPSRKLVAL   | HPRVGDIL   |
| IPRHLQLAI  | SPRPNHSYI  | SPRWGGIMV   | SPVVRVAV    | KPSLAPSL   |
| TPWQPPTVL  | VPRPVLRAL  | RPPEVILEL   | KPRPPLHLL   | SPRFPAYQL  |
| SPRAPVQVI  | SPRPAPLLL  | HAIPPTLAM   | SPIEKSGVL   | SPANPAHIL  |
| APRAVFPSI  | SPNQKLLAV  | YAASSYLSL   | APAPKAYVL   | SPQSNPVL   |
| MPLPGTKAL  | MPRKITEVL  | SAHSHFISL   | RPWLRPAAL   | CPRPEGLNF  |
| SPAPPPQVQ  | LPKQPPLAL  | MPFPNIRSAEL | APSKPAASI   | LSPSPRISL  |
| IPMPPPLGL  | VPVGPPLSL  | YPRPGTPAA   | APAPRPSLL   | SPAFSTRVL  |

**Supplementary Table S9. Potential target peptides for TCR 16A2 with predicted binding to HLA-B\*07:02 and HLA-B\*51:01.**

Peptides selected as potential target peptides for TCR 16A2. The peptide that activated 58-16A2 is highlighted in red.

**SUPPLEMENTARY FIGURES****Supplementary Figure S1**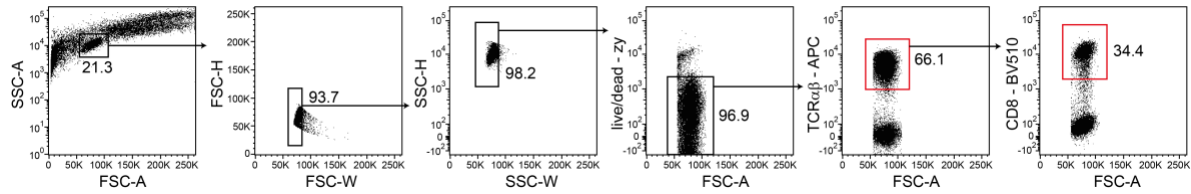**Supplementary Figure S1. Gates for single cell index sorting.**

Sequential gating on lymphocytes, single cells, live cells,  $\alpha\beta$  T cells,  $CD8^+$  cells. Gates from which cells were finally sorted are indicated in red. Primarily, the  $TCR\alpha\beta$  gate was used for sorting. If frequencies of  $CD8^+$  T cells were low, we sorted additional single  $TCR\alpha\beta^+CD8^+$  cells to ensure representation of approx. 50%  $CD8^+$  T cells among all sorted cells. The figure shows sort gates of MM112 as representative example. zy indicates zombie yellow; APC, allophycocyanin; and BV, Brilliant Violet.

Supplementary Figure S2

MM195

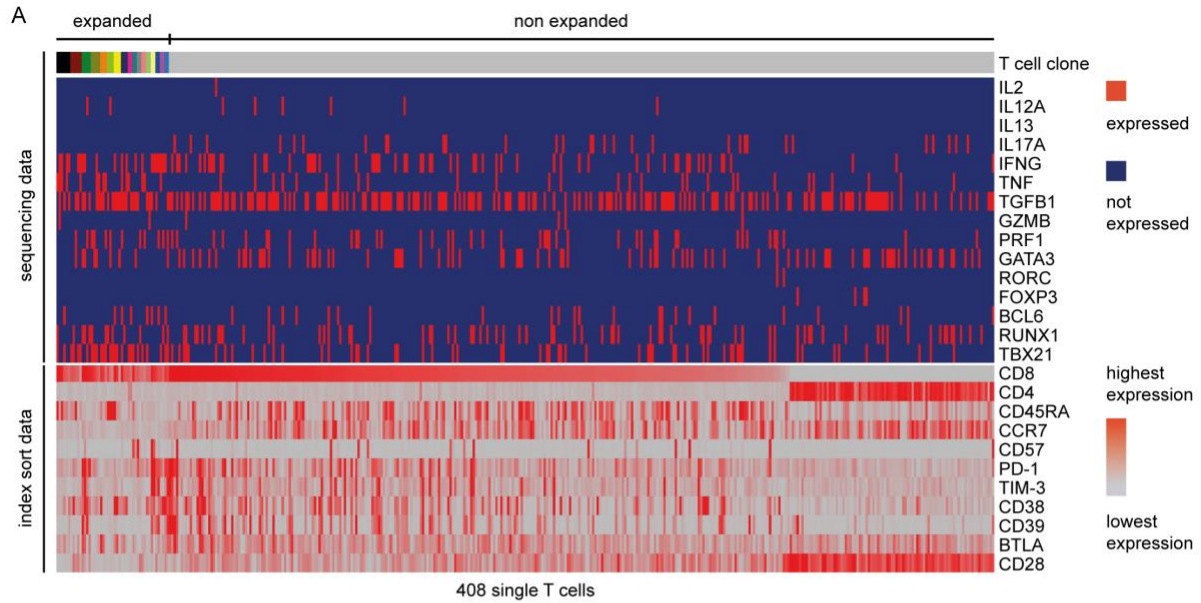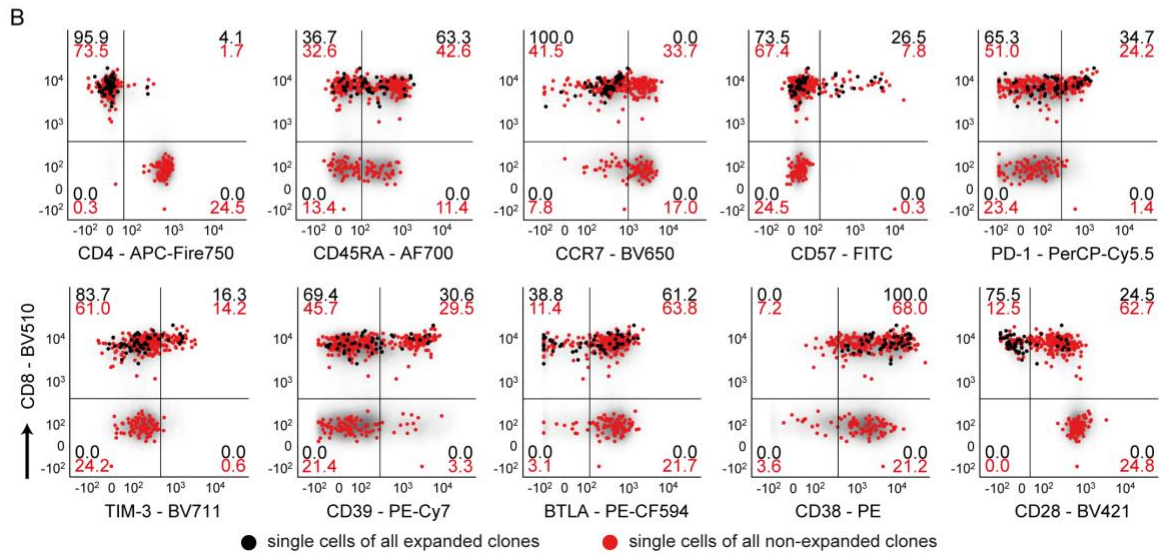

Supplementary Figure S2 continued

MM104

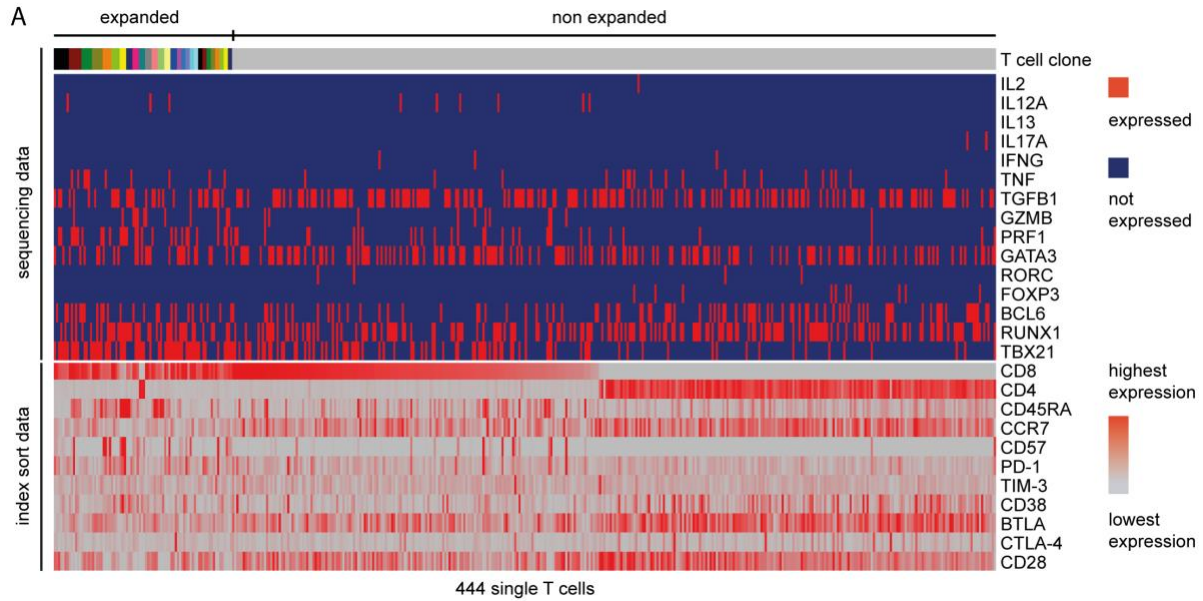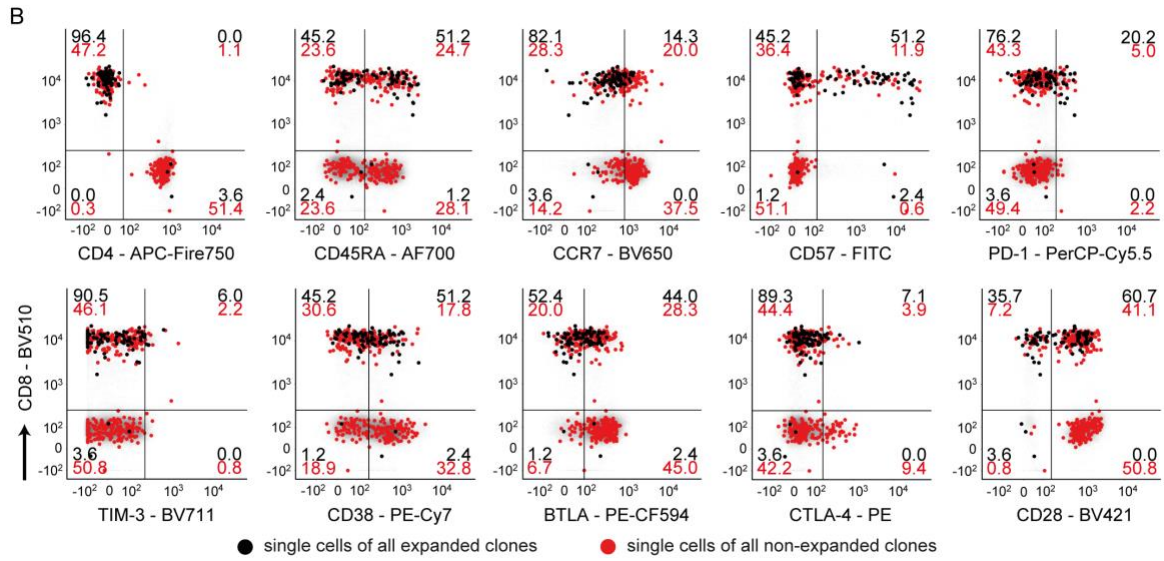



Supplementary Figure S2 continued

MM078

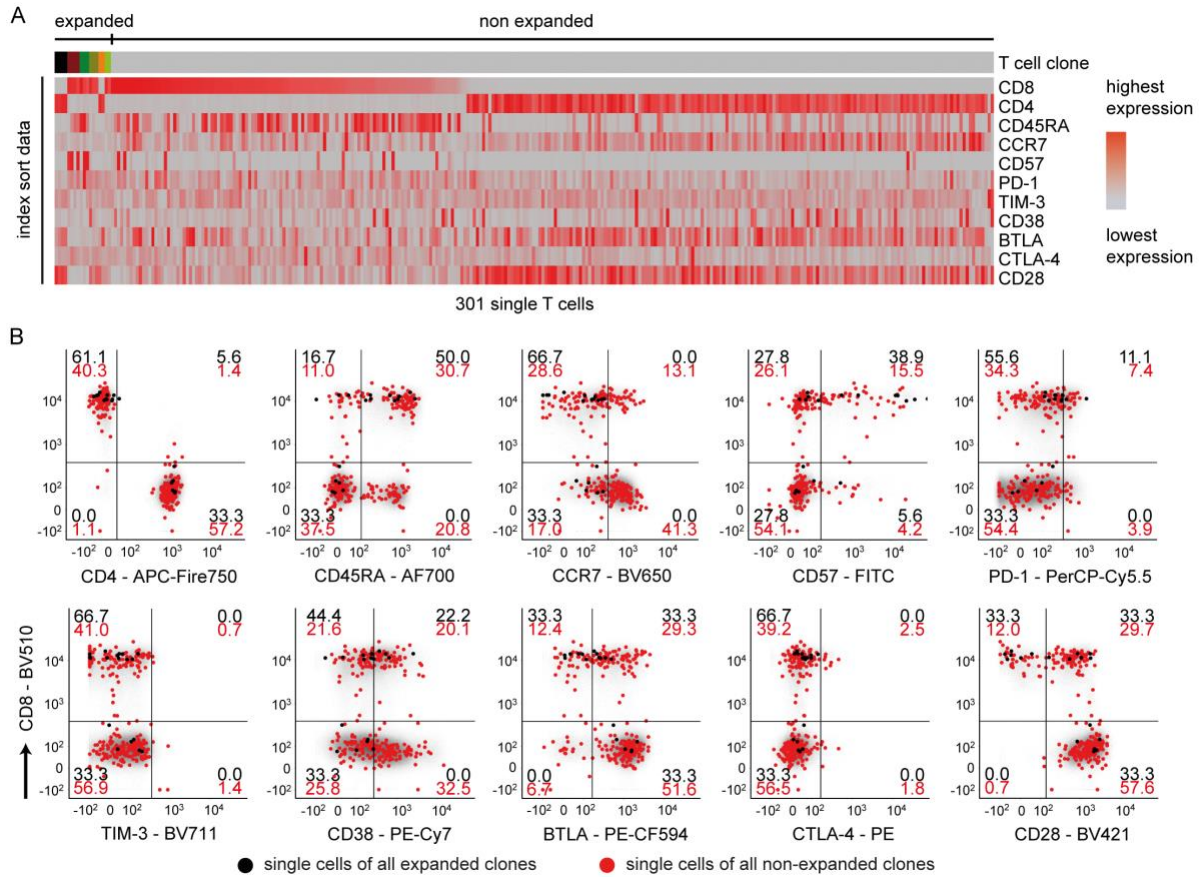

Supplementary Figure S2 continued

MM165

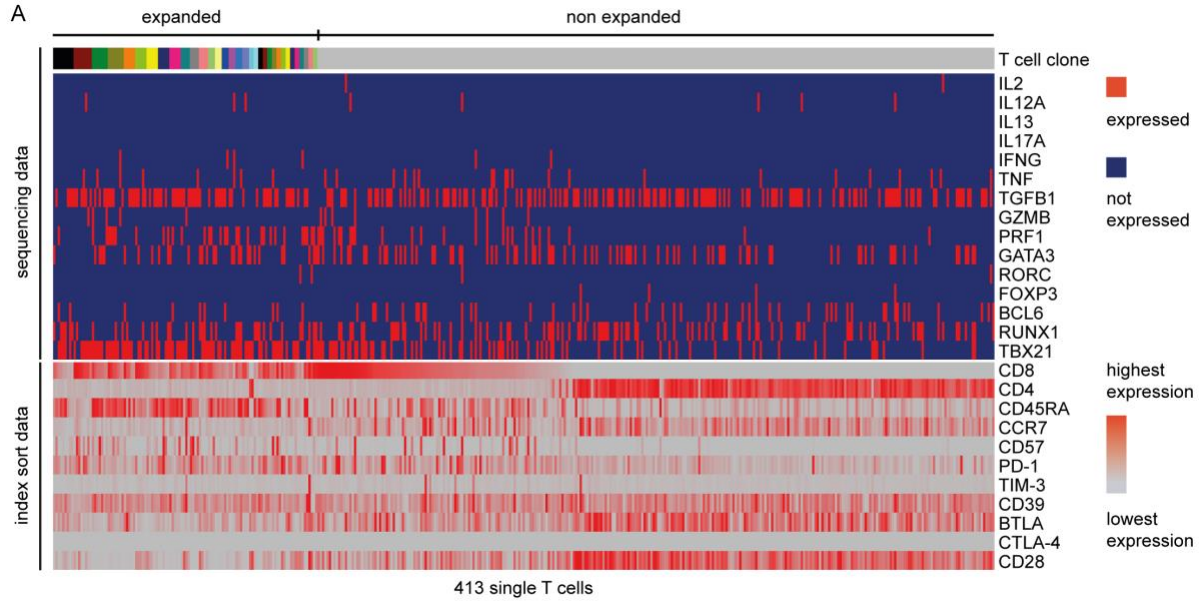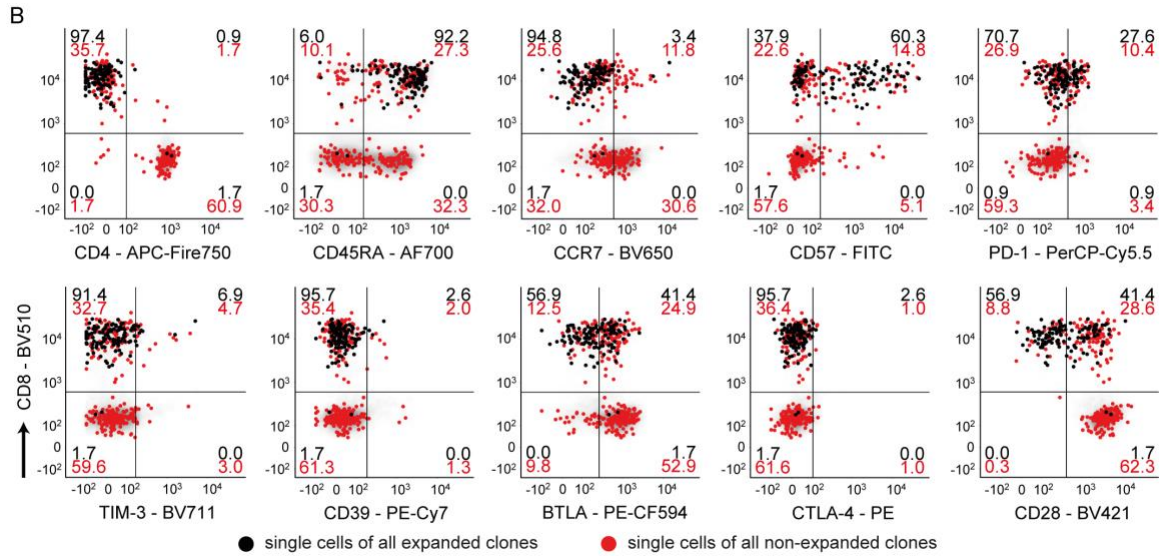



Supplementary Figure S2 continued

MM061

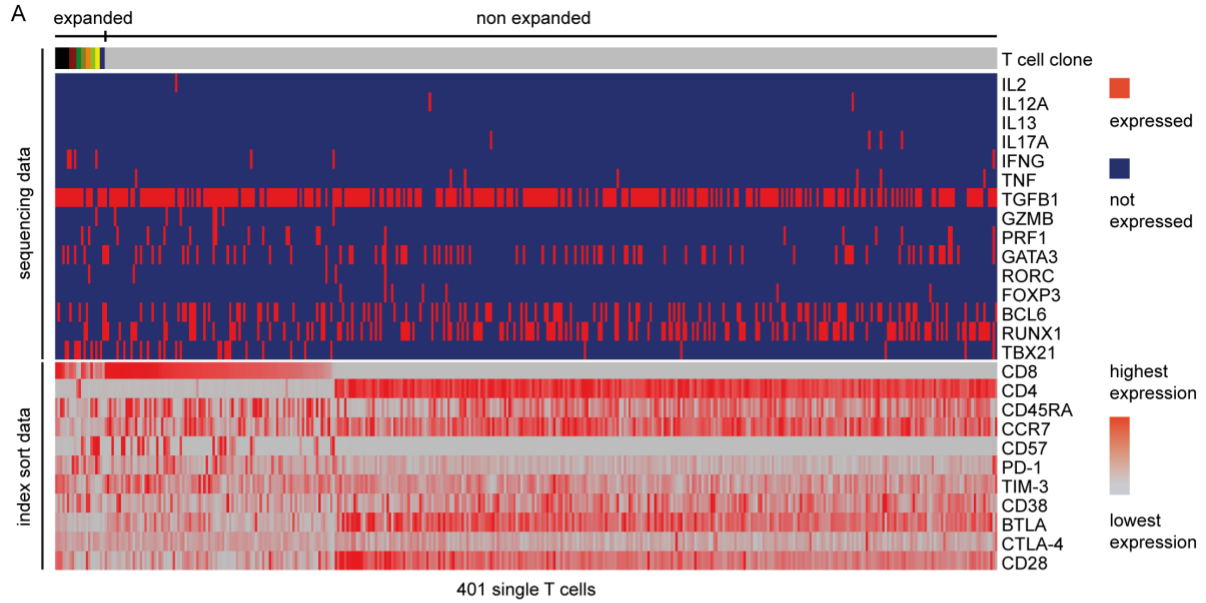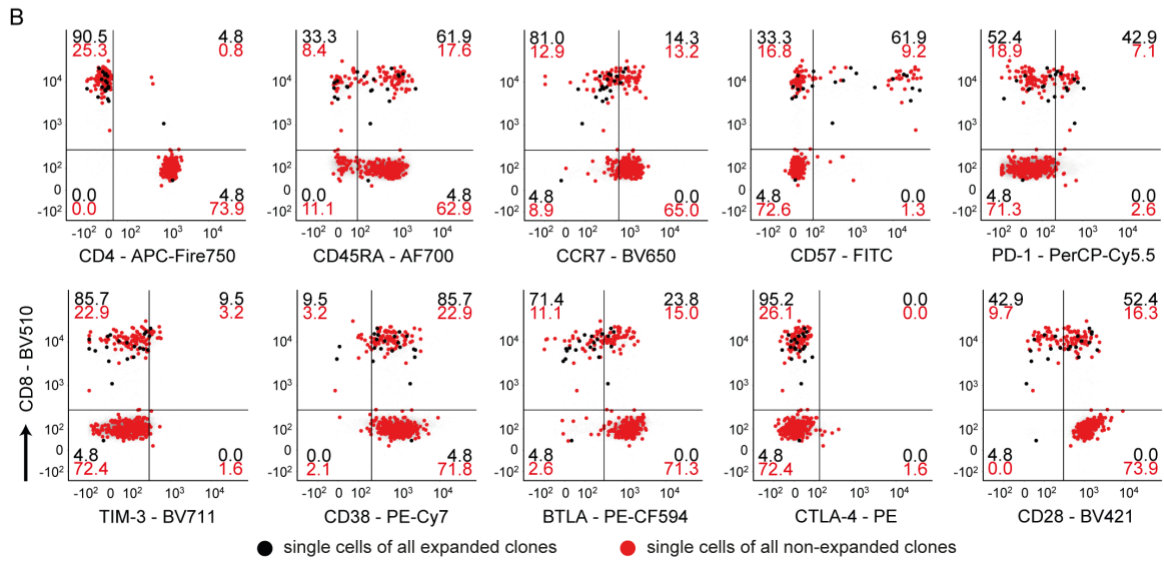

Supplementary Figure S2 continued

MM112

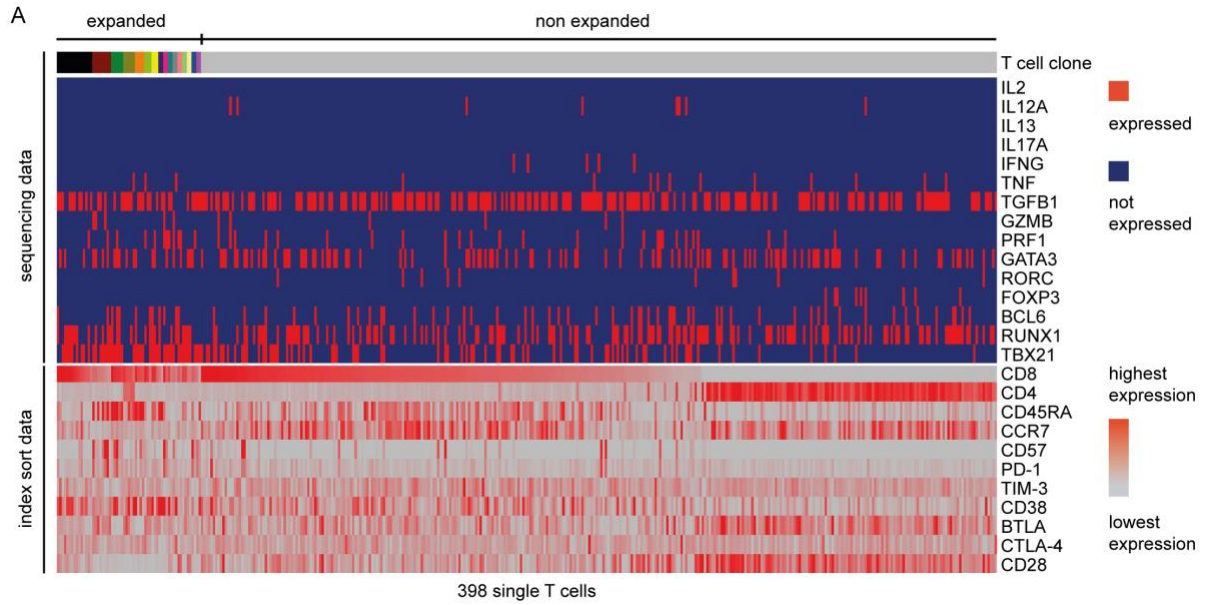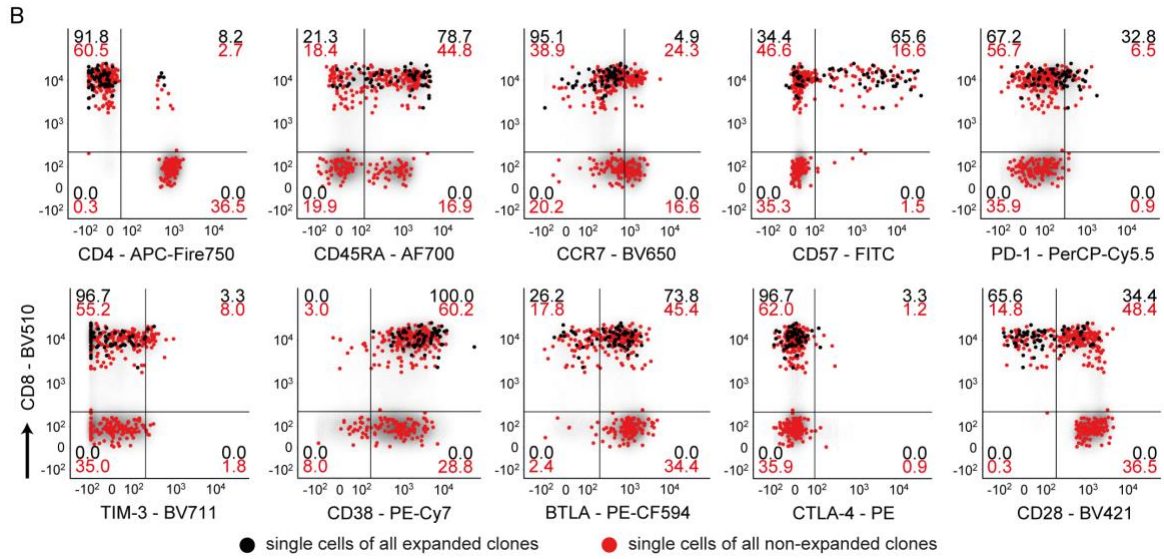

Supplementary Figure S2 continued

MM204

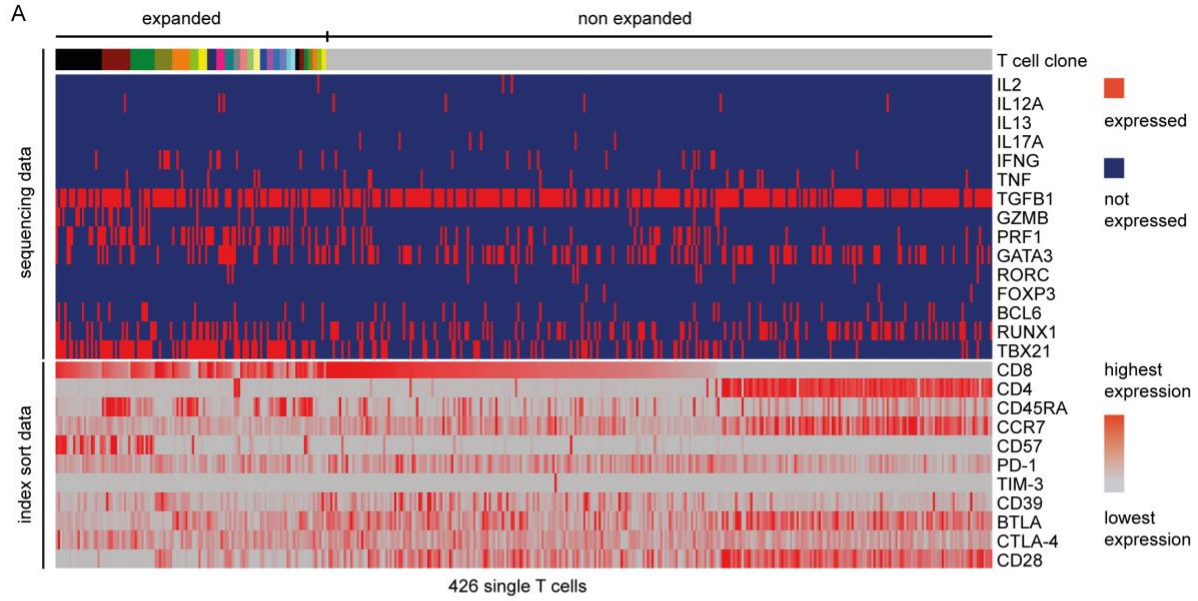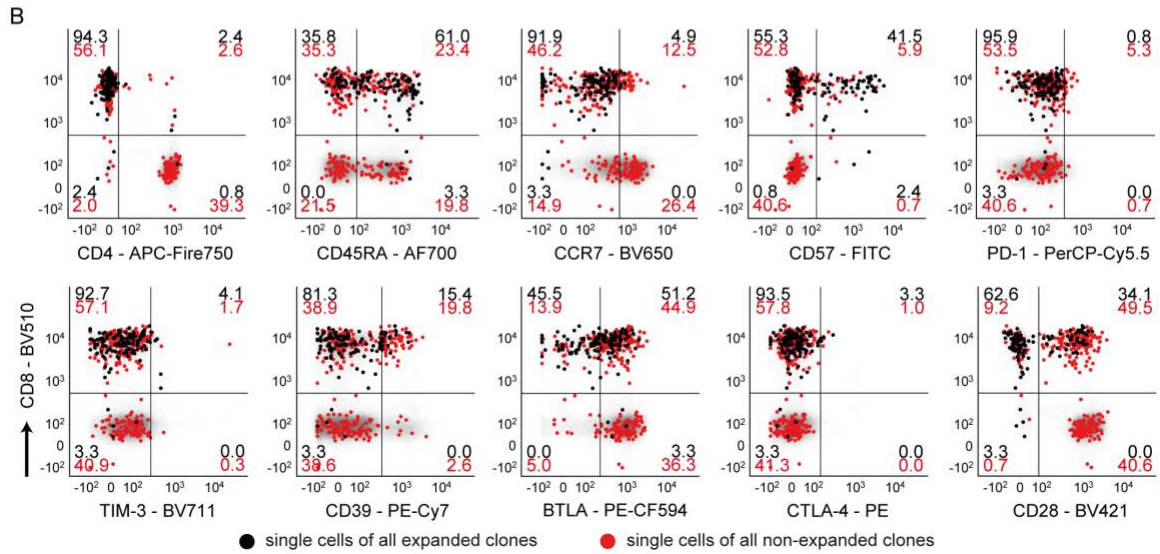

Supplementary Figure S2 continued

MM008

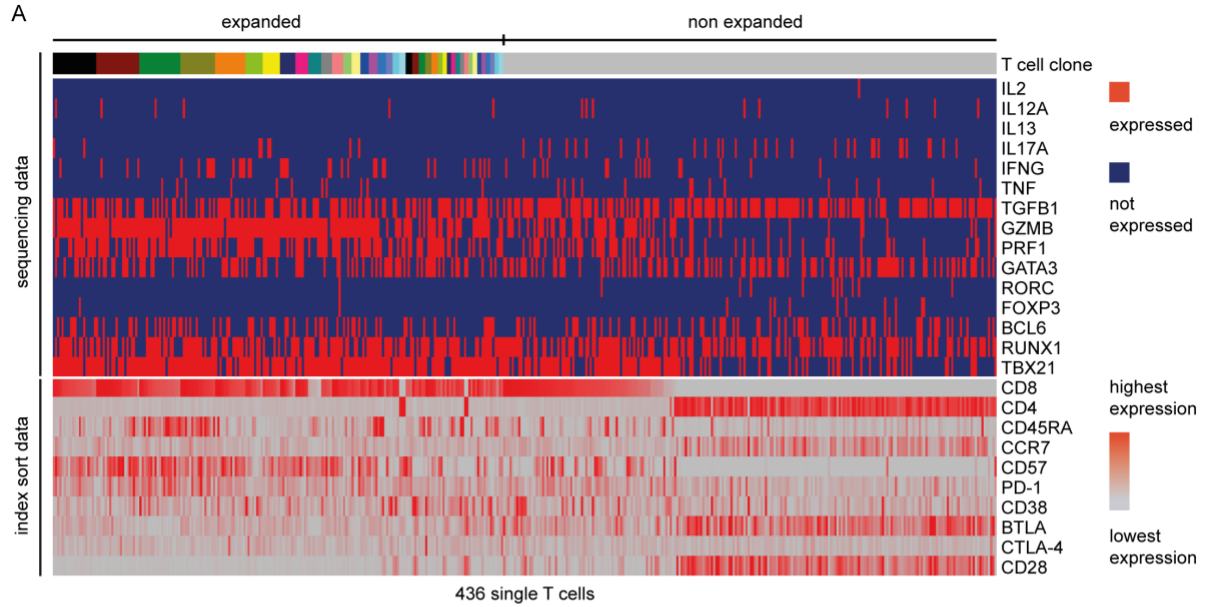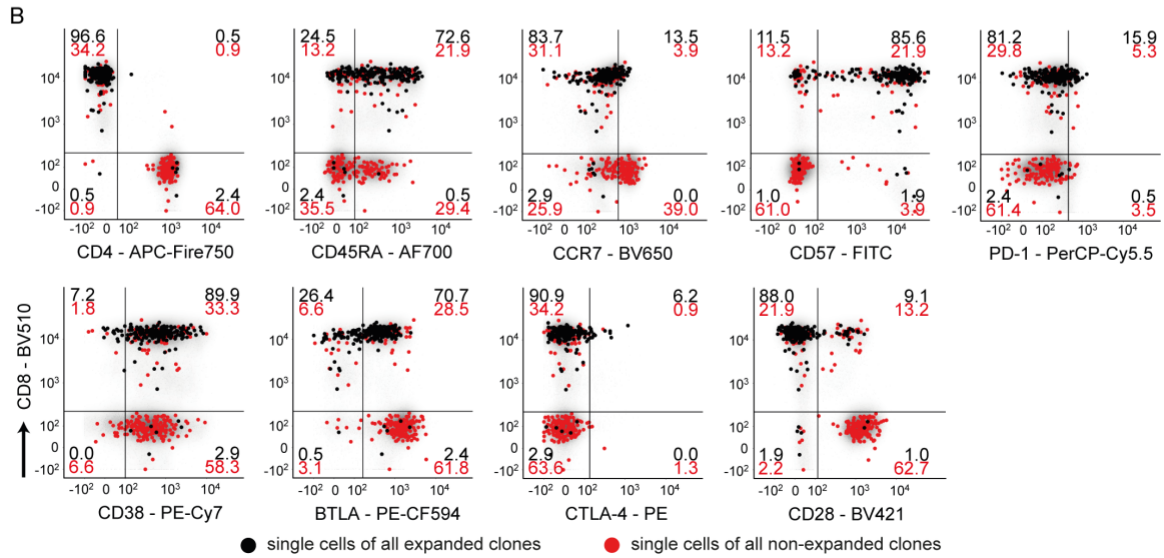

Supplementary Figure S2 continued

MM003

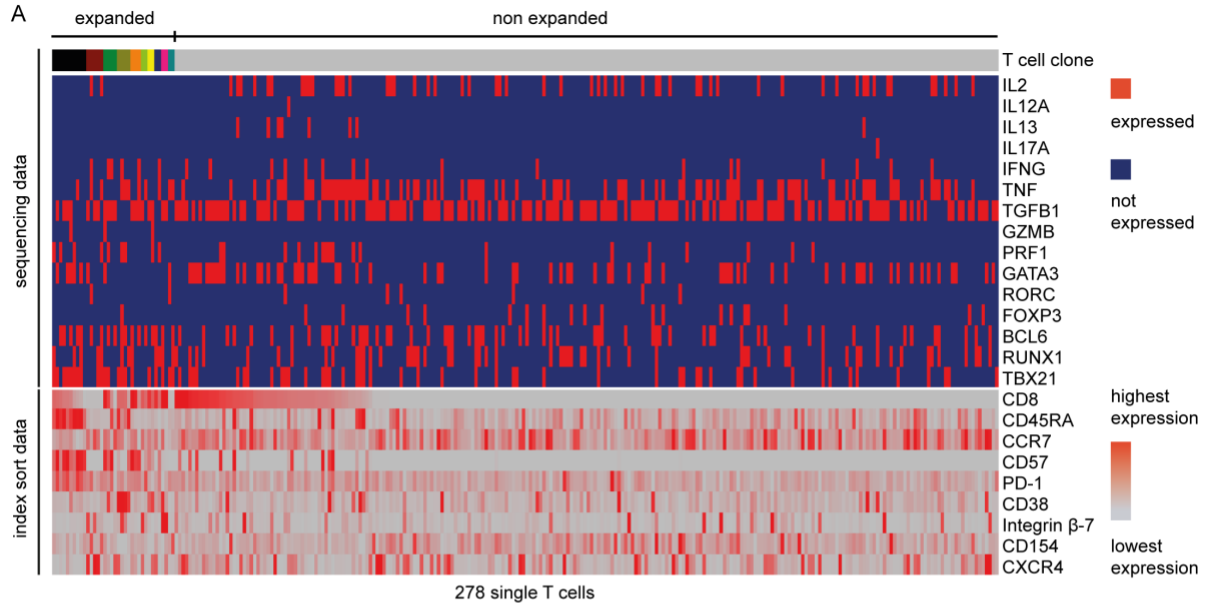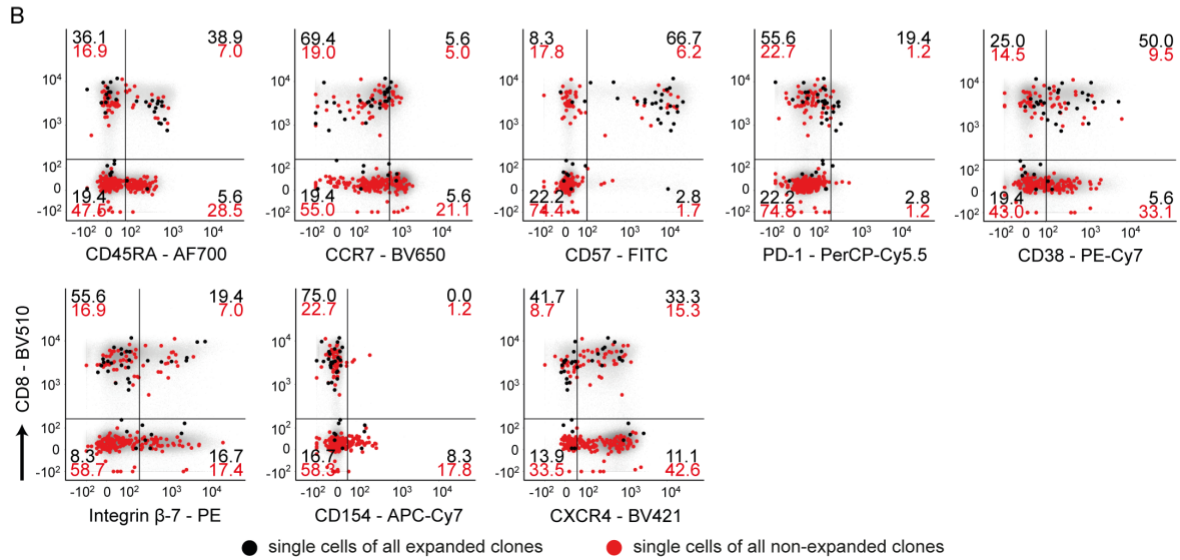



Supplementary Figure S2 continued

MM157

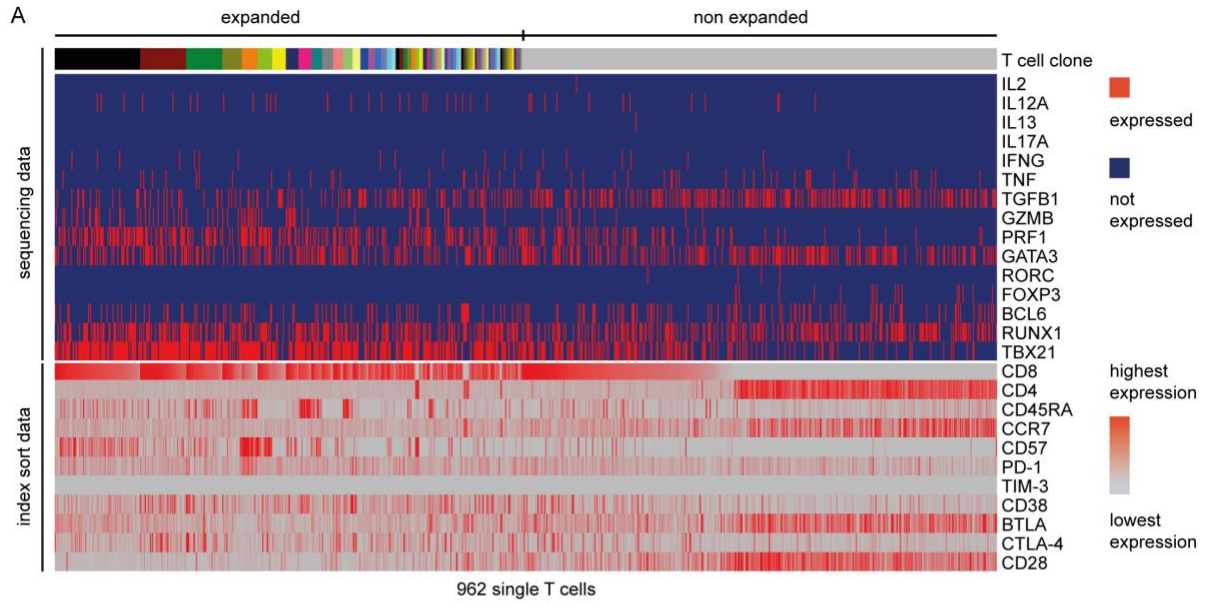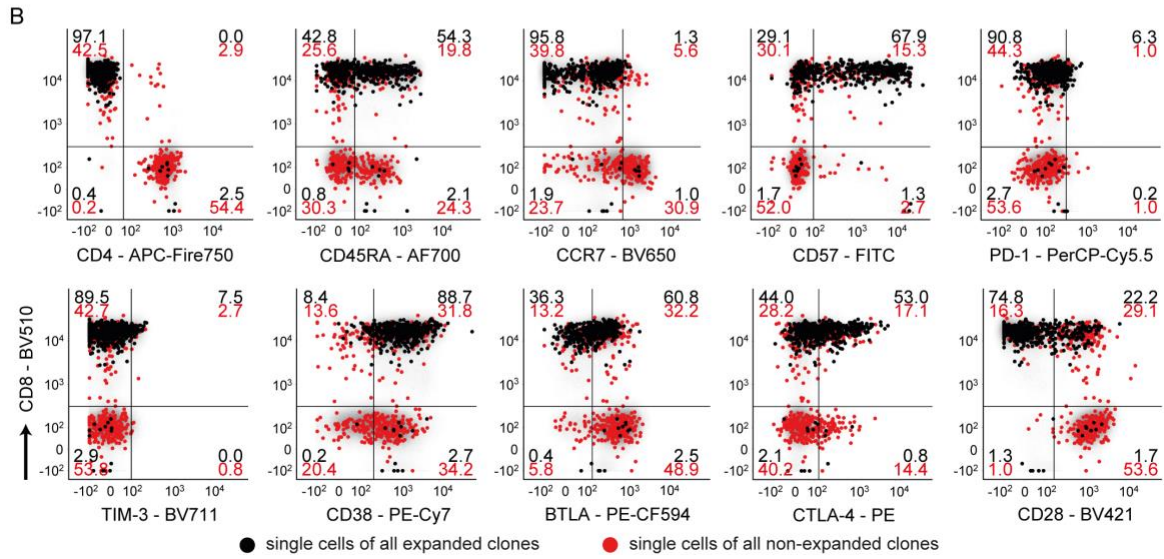

Supplementary Figure S2 continued

MM050

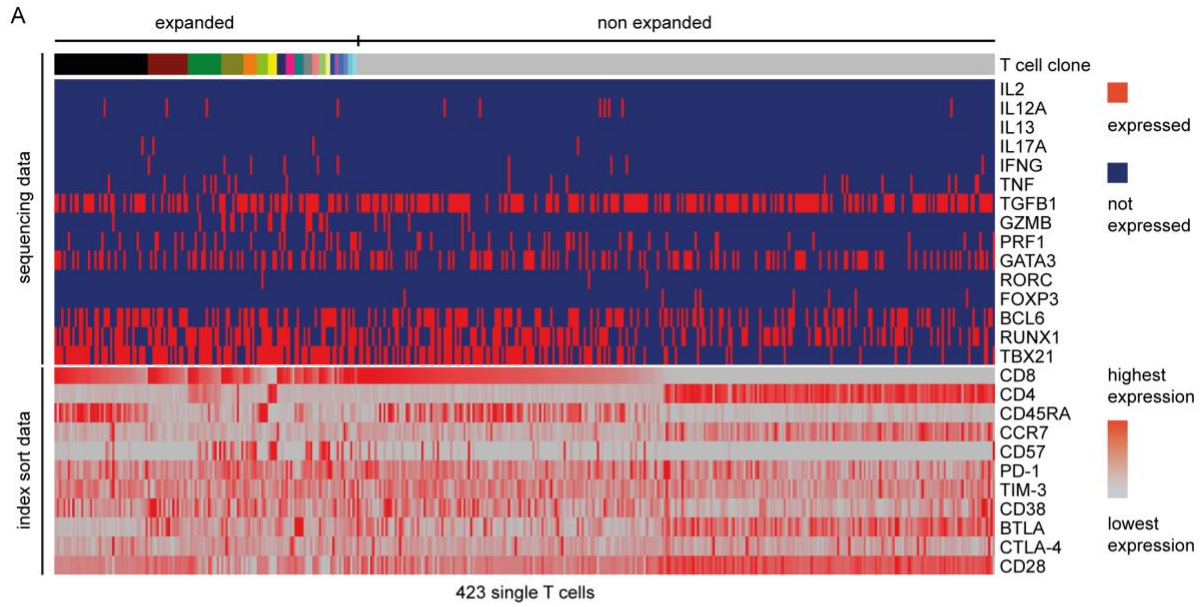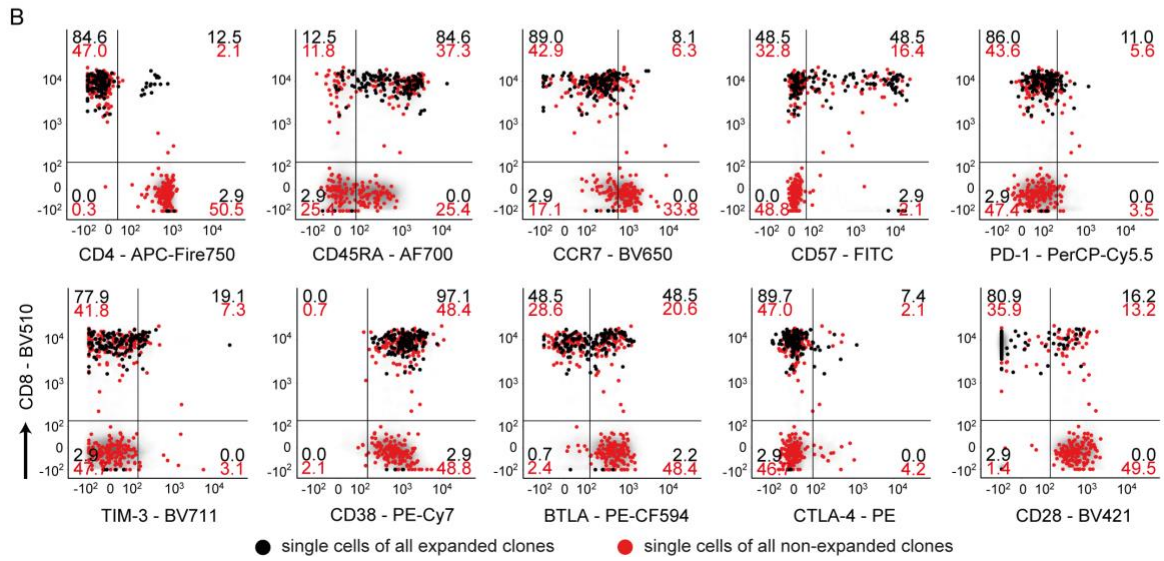

Supplementary Figure S2 continued

MM139

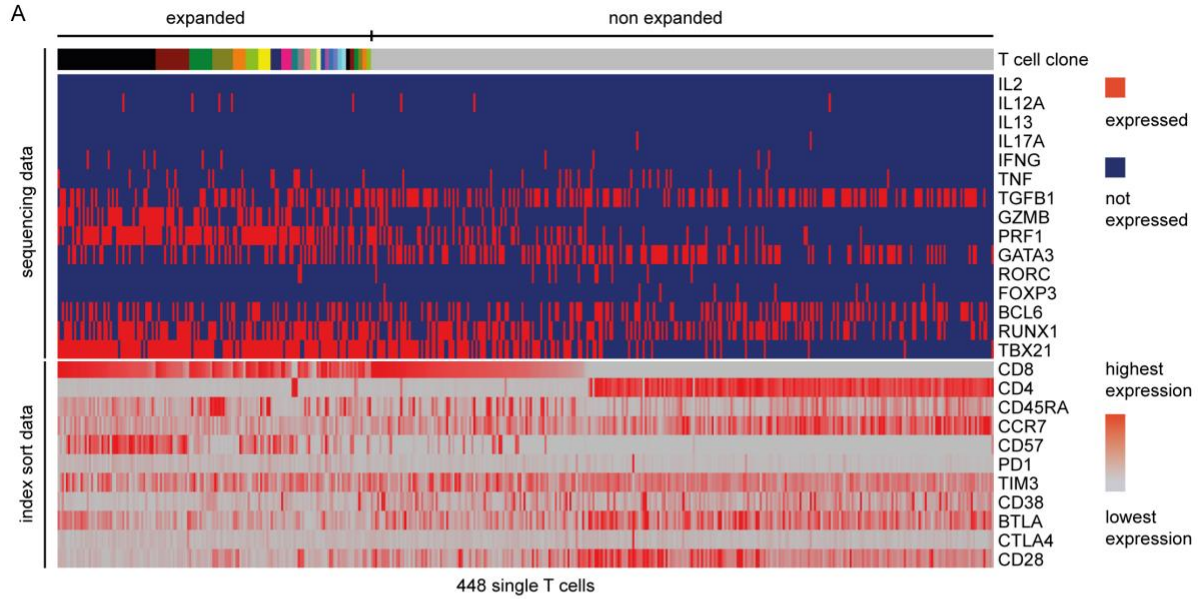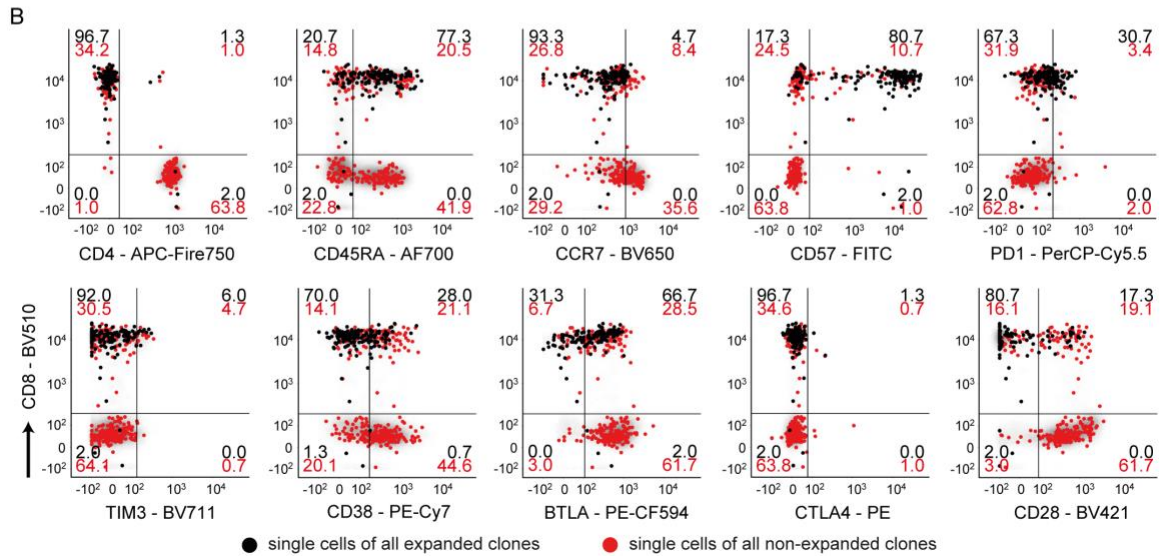



## Supplementary Figure S2 continued

MM160

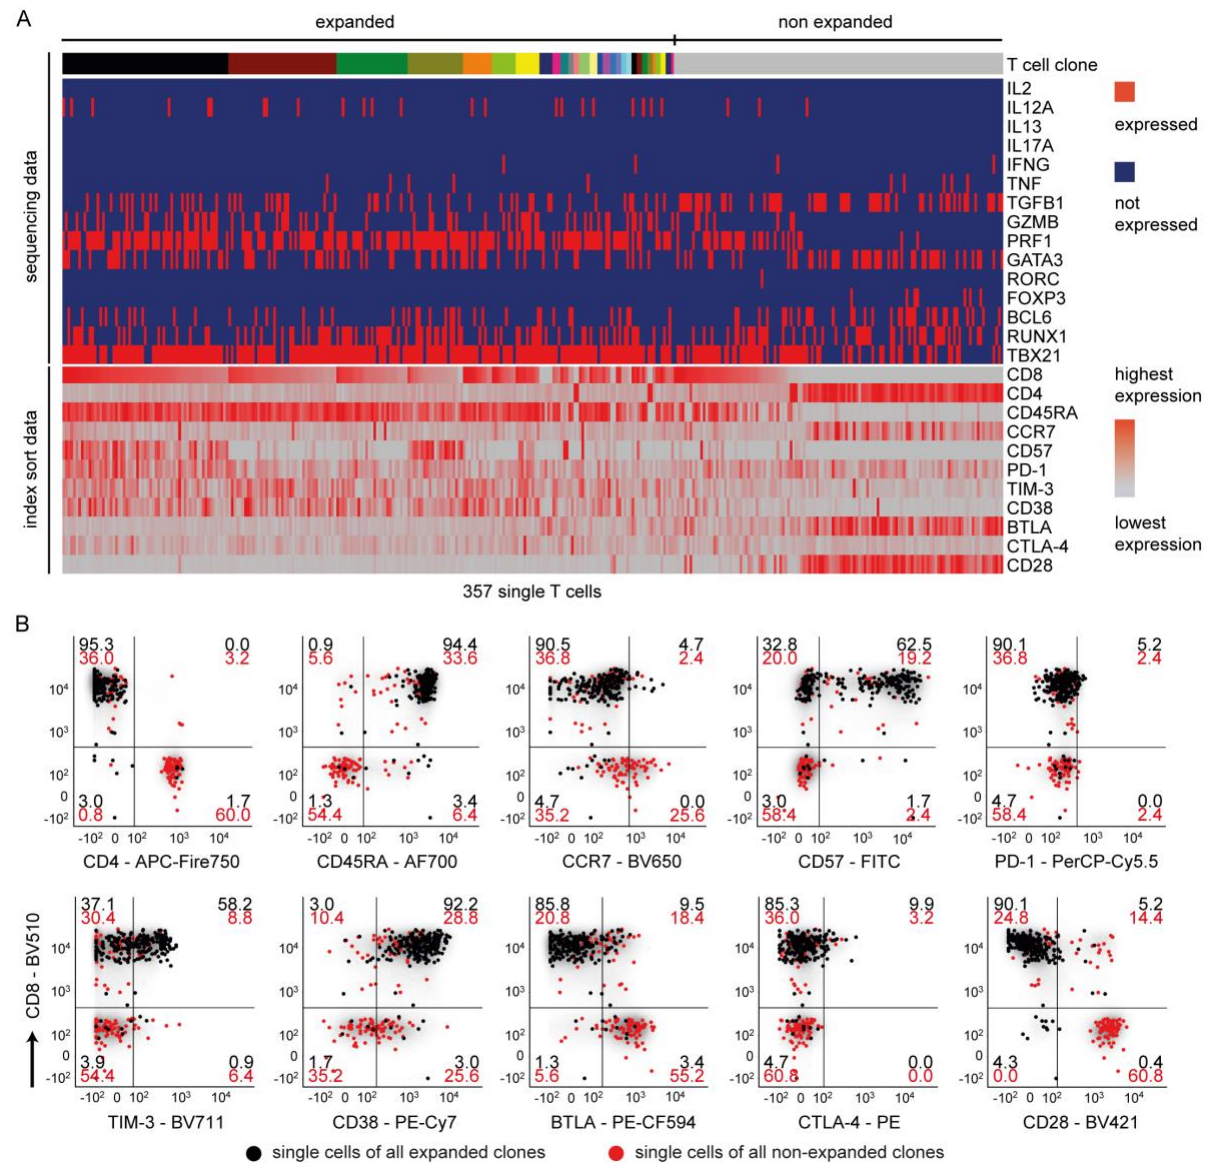

## Supplementary Figure S2. Clonal expansion-associated phenotypes of bone marrow T cells.

(A) Sequencing of TCR $\alpha\beta$ , transcription factor, and cytokine genes from amplified cDNA of single FACS-sorted T cells. Single cell data are arranged in columns with each column representing one single cell. The top bar indicates TCR sequences; adjacent columns with the same color in the top bar indicate single cells with identical CDR3 amino acid sequences of TCR $\alpha\beta$

genes. The lower part of the heatmap visualizes corresponding FACS index sort data. (B) FACS plots show immune phenotypes of expanded and non-expanded T cell clones determined by FACS index sorting. Each data point represents one single T cell belonging to an expanded (black) or non-expanded (red) clone. Numbers within gates indicate percentages.

From T cells of MM078, only TCRs were sequenced and immune phenotypes were determined by index sorting.

**Supplementary Figure S3**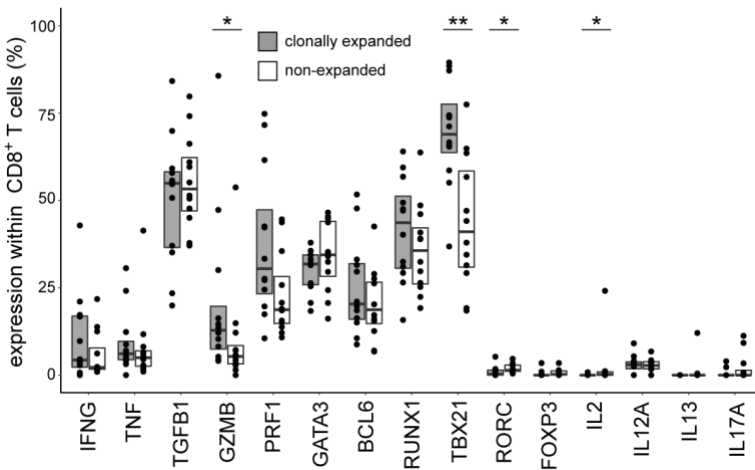

**Supplementary Figure S3. Cytokine and transcription factor expression in expanded and non-expanded bone marrow T cell clones.**

Single cell gene expression of selected cytokines and transcription factors in expanded or non-expanded CD8<sup>+</sup> T cells. Data points represent individual patients. Boxes range from 25<sup>th</sup> to 75<sup>th</sup> percentiles, lines within boxes indicate medians. Data were acquired in n=12 experiments. Statistical significance was calculated using the two-sided Wilcoxon test, \* p<0.05, \*\* p<0.005

**Supplementary Figure S4**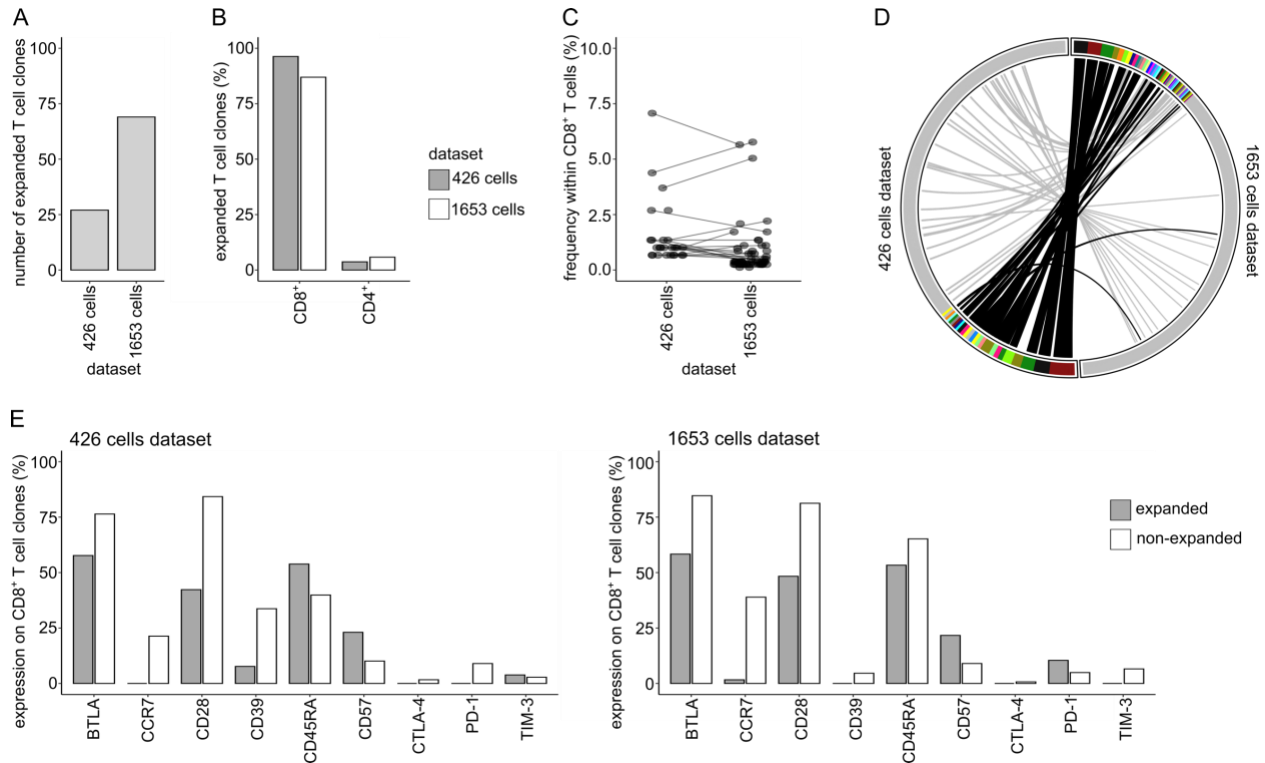

**Supplementary Figure S4. Clonal expansion-associated immune phenotypes were not substantially affected by varying total numbers of sequenced cells.**

FACS index sort and sequencing data from additional 1653 bone marrow T cells of patient MM204 as an example were generated from another cryopreserved bone marrow vial of the same bone marrow aspiration that was used to create the initial 426 T cell dataset (technical replicate).

(A) shows total numbers of expanded T cell clones. (B) shows expression of CD8 and CD4 on expanded T cell clones. (C) compares frequencies of individual expanded T cell clones identified in the 426 cells dataset with frequencies of these clones within the new 1653 cells dataset. Each data point represents one expanded T cell clone. (D) illustrates frequencies and overlap of individual expanded and non-expanded T cell clones. (E) shows expression of phenotype parameters determined by FACS single cell index sorting compared between expanded and non-expanded clones. Data were acquired in n=2 experiments.

**Supplementary Figure S5**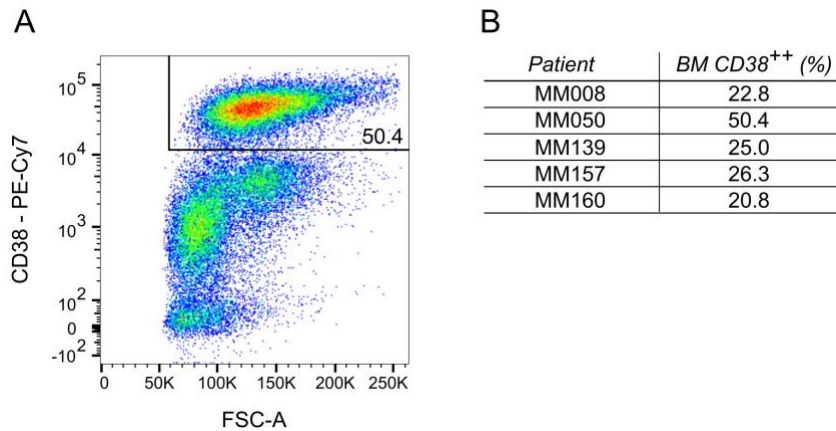

**Supplementary Figure S5. Frequencies of multiple myeloma plasma cells within bone marrow aspirate specimens.**

Frequencies of multiple myeloma plasma cells, identified by high CD38 expression, were determined by flow cytometry within bone marrow specimens. (A) shows gating on multiple myeloma plasma cells of patient MM050 as an example. The plot is pre-gated on all events after exclusion of debris by scatter characteristics. (B) summarizes frequencies of multiple myeloma plasma cells, determined as shown in (A) for all patients from whom we determined clonal overlap with peripheral blood and re-expressed selected dominant TCRs for incubation with multiple myeloma cells.

## Supplementary Figure S6

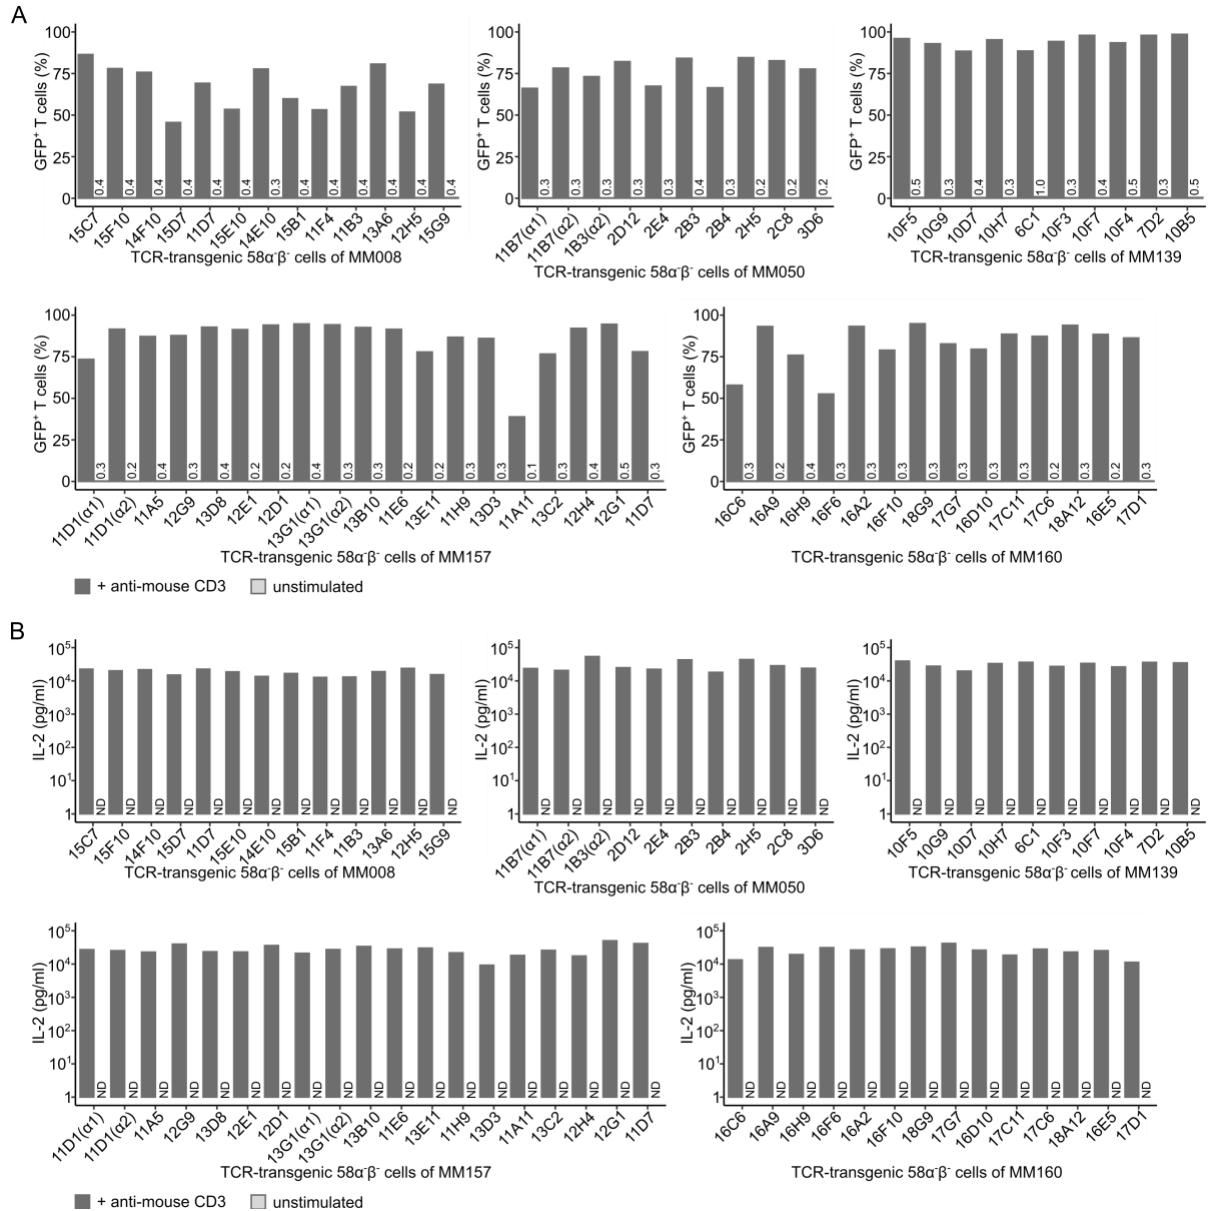

**Supplementary Figure S6. GFP and IL-2 production of TCR-recombinant 58 $\alpha$  $\beta$ <sup>-</sup> cell lines after CD3 stimulation.**

TCR-recombinant 58 $\alpha$  $\beta$ <sup>-</sup> cell lines were stimulated with plate-bound anti-mouse CD3 or left unstimulated to confirm their capacity of (A) GFP and (B) IL-2 production upon stimulation. GFP was measured by flow cytometry, IL-2 was measured by ELISA. ND indicates not detectable.

**Supplementary Figure S7**

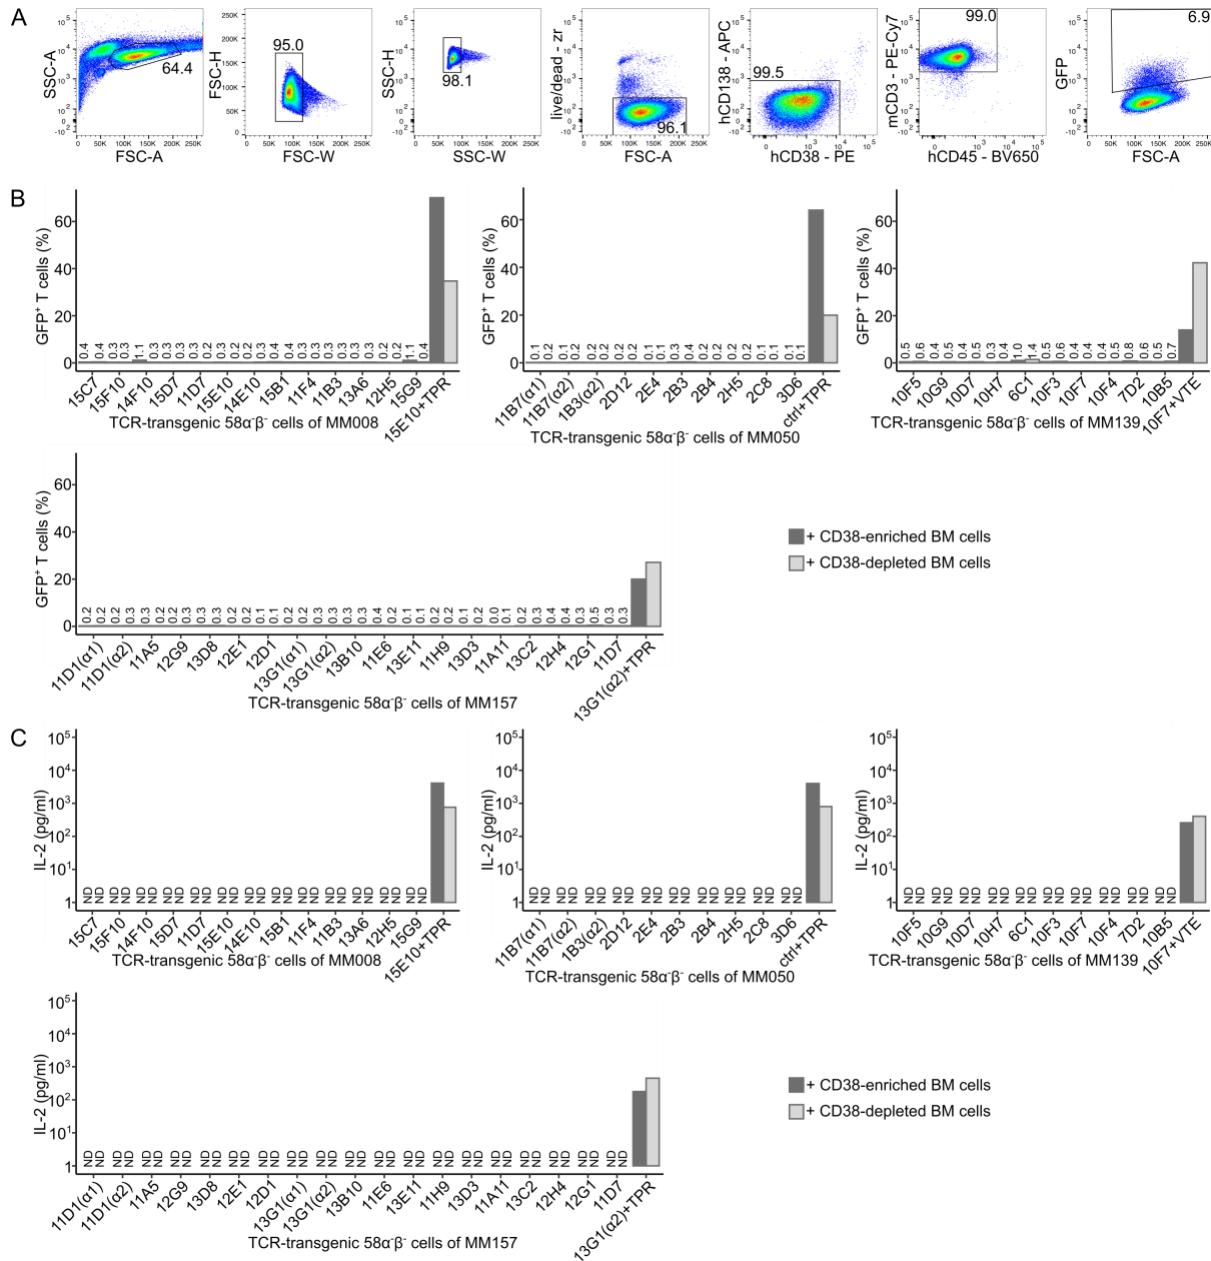

**Supplementary Figure S7. Activation of TCR-recombinant 58αβ<sup>-</sup> cell lines by multiple myeloma bone marrow.**

(A) Identification of TCR-recombinant 58αβ<sup>-</sup> cells. From left to right: Sequential gating on lymphocytes, single cells, exclusion of dead cells, exclusion of multiple myeloma cells, selection

of CD3<sup>+</sup> murine T cells, and gating on GFP<sup>+</sup> cells. The GFP gate was set based on unstimulated controls. zr indicates zombie red. (B and C) GFP and IL-2 production of TCR-recombinant 58 $\alpha$  $\beta$  cell lines upon incubation with respective multiple myeloma and non-myeloma cells. In case one of the re-expressed TCRs had already been reported specific for a virus-derived peptide (e.g. 15E10 from MM008), we used peptide-loaded multiple myeloma and non-myeloma cells to confirm myeloma cells of the respective patient were capable of peptide presentation. TPR: derived from CMV pp65 (417-426), VTE: derived from CMV pp50 (245-253). In case of MM050, in which none of the expanded TCRs had already been reported virus-specific, we used the same TPR-specific, HLA-B\*07:02-restricted TCR as control as in MM008 (“ctrl”). ND indicates not detectable.



**Supplementary Figure S8**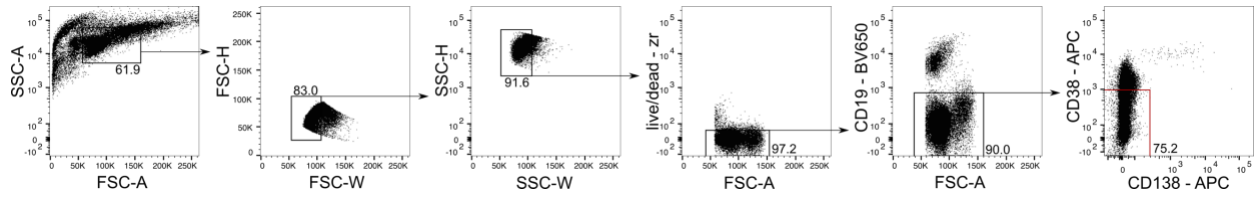

**Supplementary Figure S8. FACS depletion of remaining multiple myeloma and B lineage cells from MACS CD38-depleted populations.**

From left to right: Sequential gating on nucleated cells, single cells, exclusion of dead cells, exclusion of B cells, selection of CD38<sup>+</sup>CD138<sup>-</sup> cells. The gate from which cells were finally sorted is highlighted in red. zr indicates zombie red.

Supplementary Figure S9

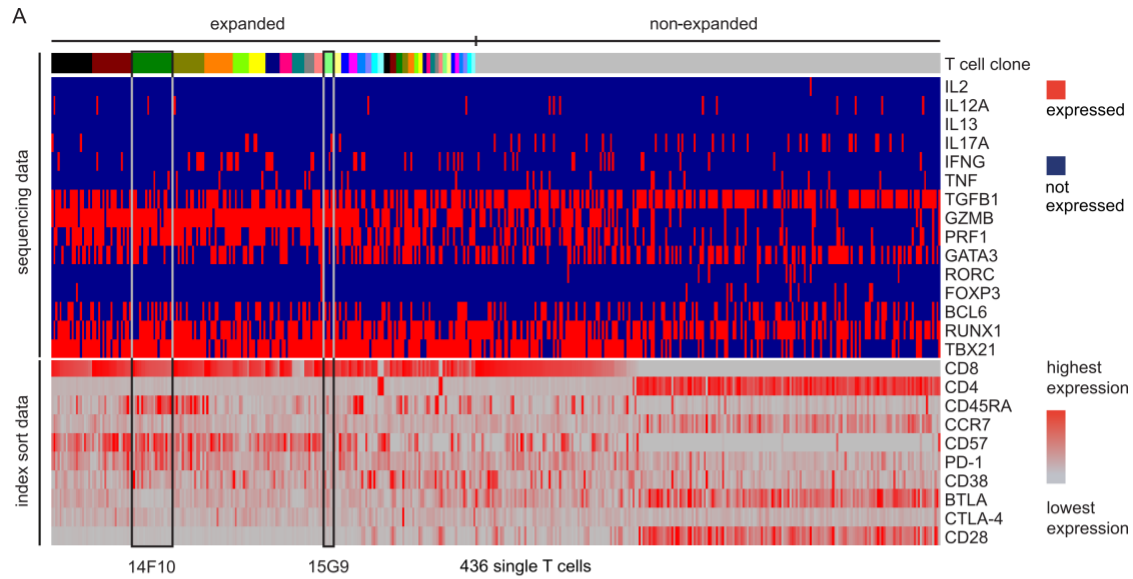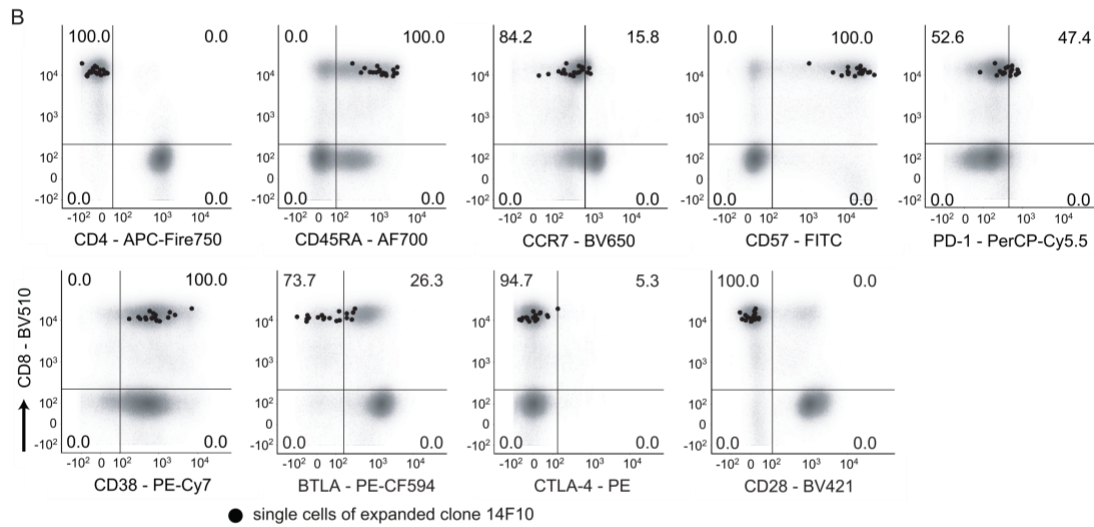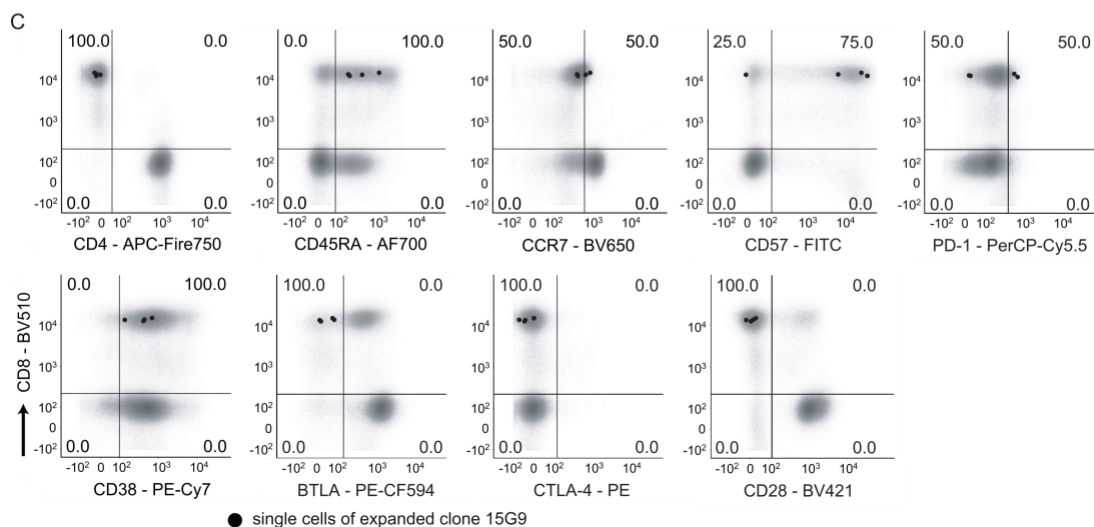

## Supplementary Figure S9 continued

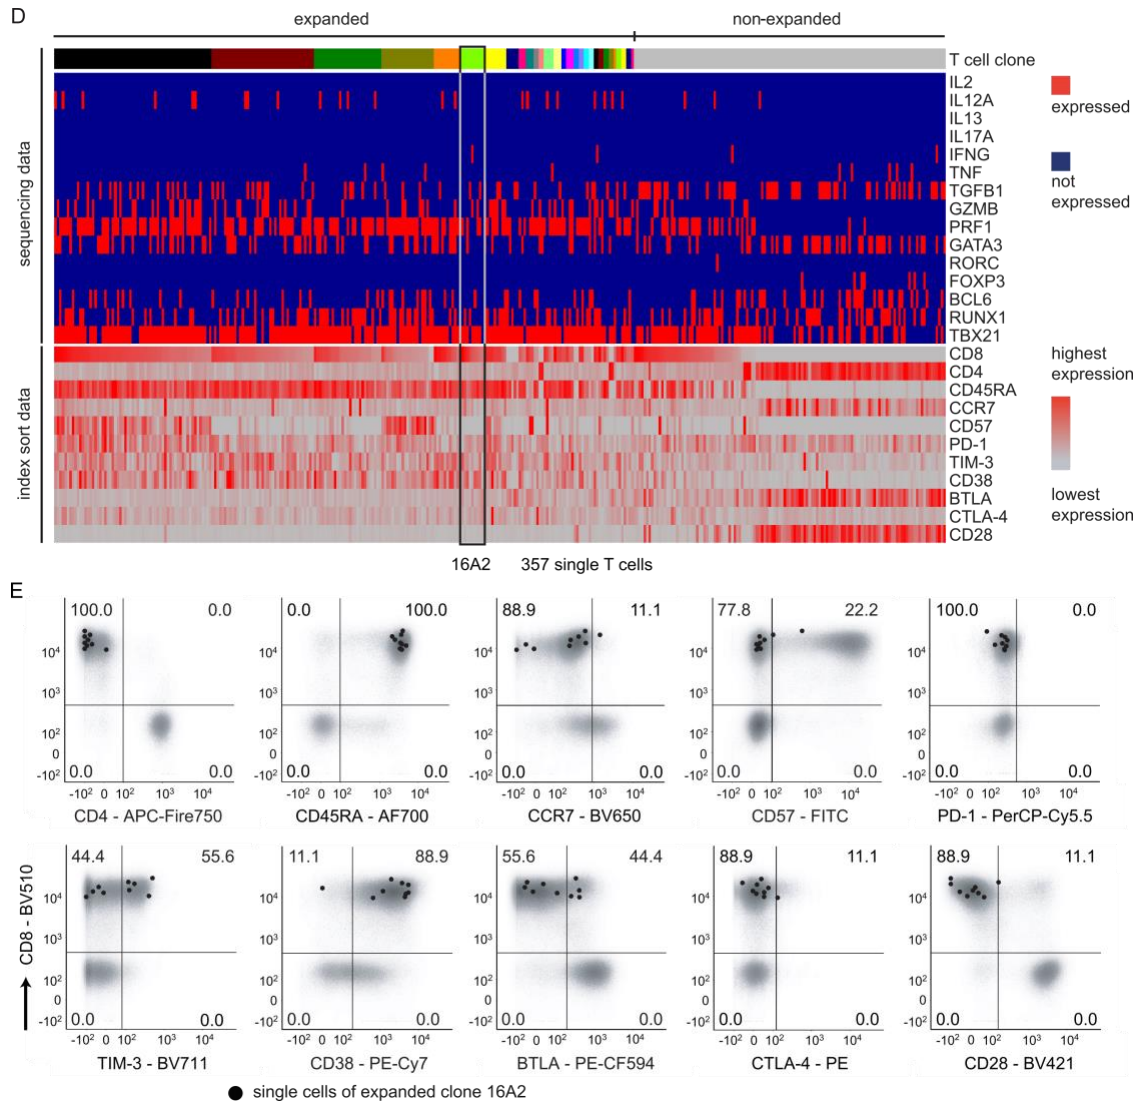

**Supplementary Figure S9. Immune phenotypes of multiple myeloma-reactive expanded T cell clones.**

(A and D) Sequencing of TCR $\alpha\beta$ , transcription factor, and cytokine genes from amplified cDNA of single FACS-sorted T cells. Single cell data are arranged in columns with each column representing one single cell. The top bar indicates TCR sequences; adjacent columns with the same color in the top bar indicate single cells with identical CDR3 amino acid sequences of TCR $\alpha\beta$  genes. The lower part of the heatmap visualizes corresponding FACS index sort data. Clones for

which detailed immune phenotypes are illustrated in FACS plots are highlighted. Data from MM008 are shown in (A), data from MM160 in (D). FACS plots show immune phenotypes of selected single T cell clones (data points in black) determined by FACS index sorting. Phenotypes of clone 14F10 are shown in (B), 15G9 in (C), and 16A2 in (E). Numbers within gates indicate percentages.

**Supplementary Figure S10**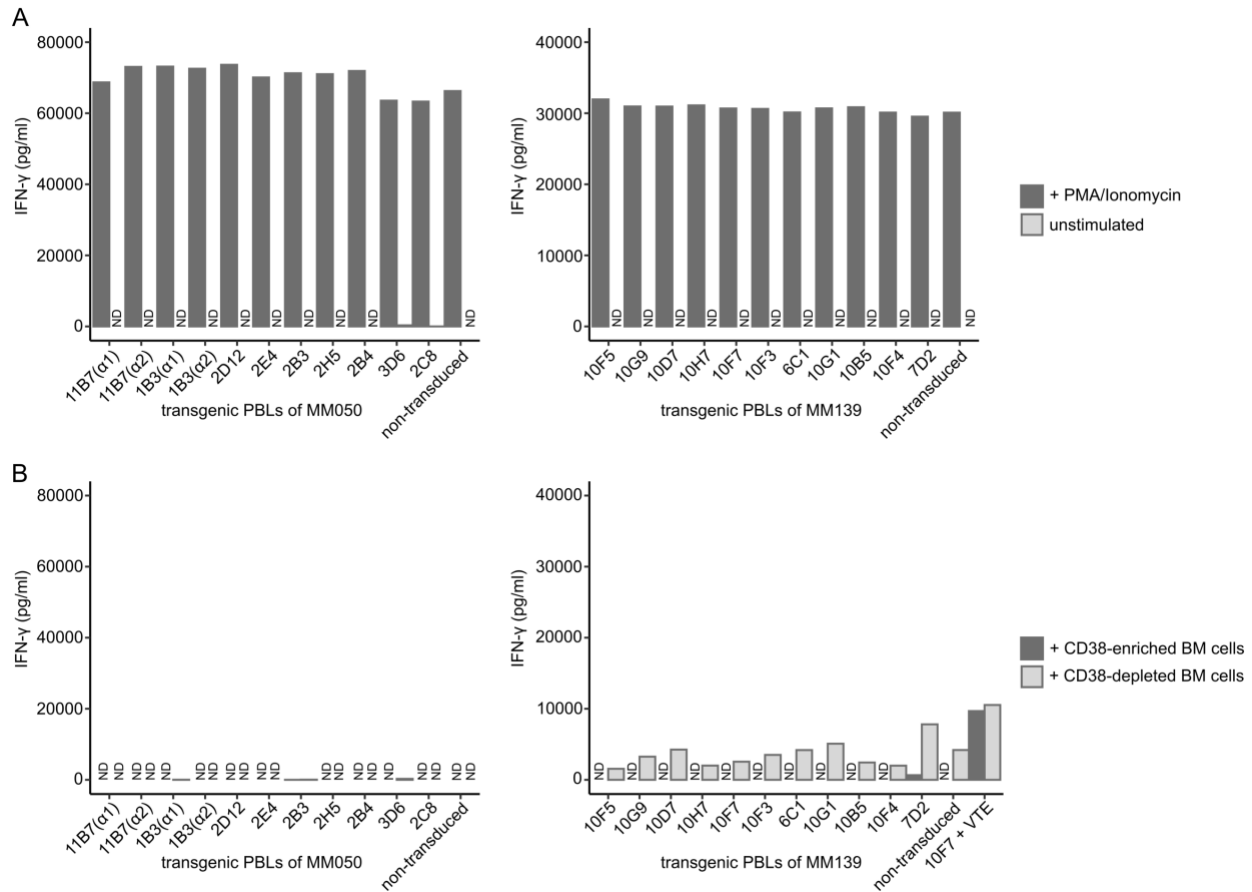**Supplementary Figure S10. Activation of TCR-transduced human PBL by multiple myeloma and non-myeloma cells.**

(A) PMA/ionomycin stimulation as positive control. (B) Incubation of all TCR-transduced human PBL with respective multiple myeloma and non-myeloma cells. Activation of TCR 7D2-expressing PBL by non-myeloma cells was not reproducible. The TCR $\beta$  chain of TCR 10F7 had previously been reported specific for the CMV-derived peptide VTEHDTLLY (VTE). We used this peptide to artificially load multiple myeloma and non-myeloma cells and confirm efficient peptide presentation. Plots show data from n=2 experiments. PBL indicates peripheral blood lymphocytes; BM, bone marrow; and ND, not detectable.

## Supplementary Figure S11

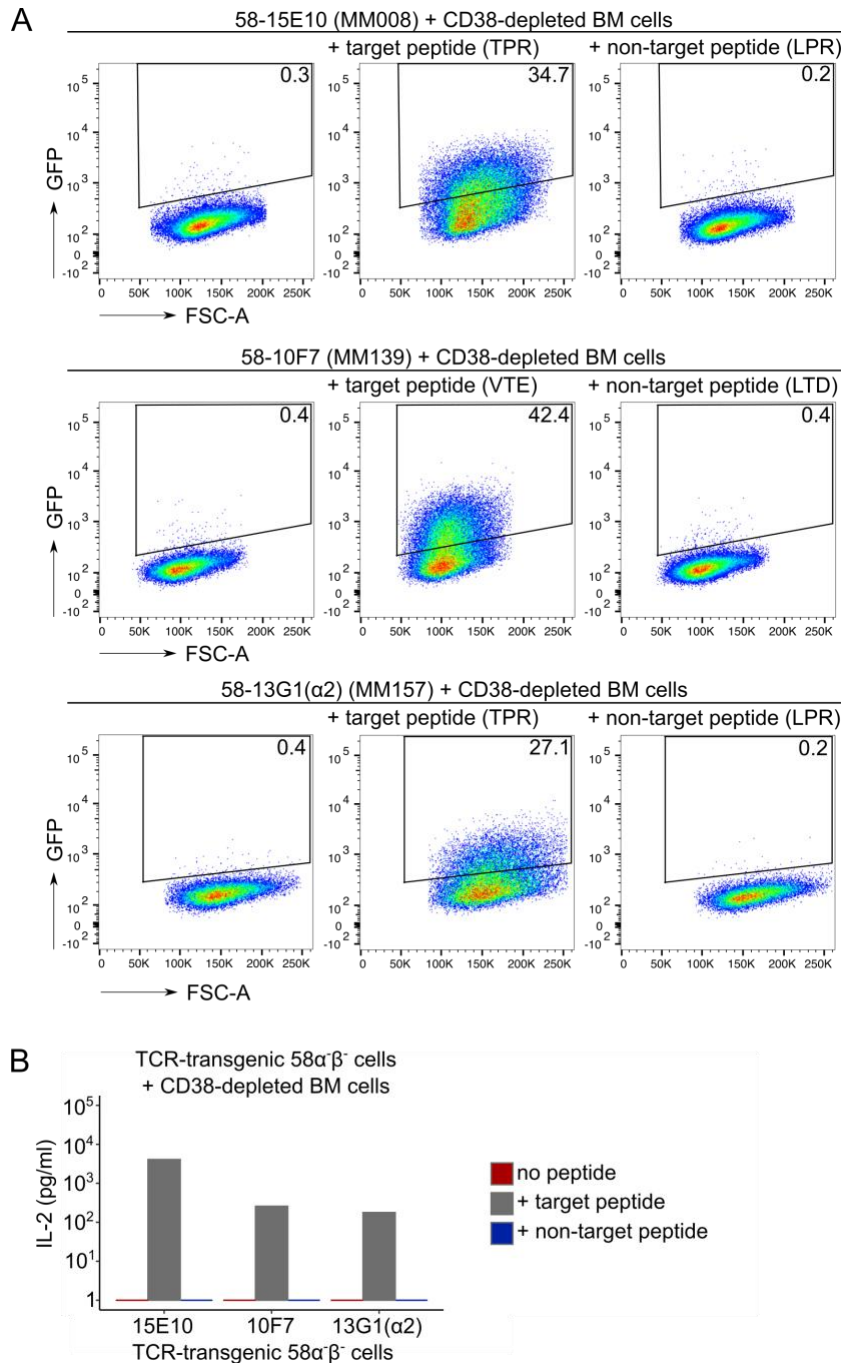

## Supplementary Figure S11. Confirmation of virus peptide specificity of selected TCRs.

Selected potentially CMV peptide-specific TCR-transgenic 58 $\alpha\beta^+$  cell lines were incubated with peptide-loaded CD38-depleted bone marrow (BM) cells from the respective patients. (A) FACS

plots in the left column show data from TCR-transgenic  $58\alpha\beta^-$  cells incubated with CD38-depleted bone marrow cells without additional peptide loading. (B) shows IL-2 detected in cell culture supernatants corresponding to co-incubations shown in (A).

Plots show data from n=3 experiments.

**Supplementary Figure S12**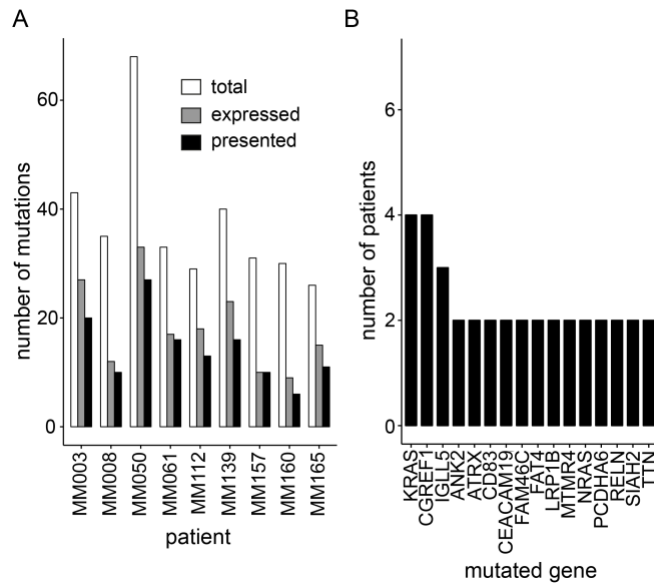

**Supplementary Figure S12. Neo-antigen load and recurrently mutated genes in nine selected multiple myeloma patients.**

“Mutation” refers to non-synonymous mutations located within exon regions. (A) shows total numbers of somatic mutations within multiple myeloma cells. Somatic mutations were determined by comparative whole exome sequencing of DNA isolated from CD38-enriched multiple myeloma cells, and peripheral blood cells or FACS-sorted non-myeloma cells. Mutation expression was determined by RNA sequencing of enriched multiple myeloma cells. Potential presentation of expressed mutations was predicted bioinformatically. (B) shows genes in which we detected mutations in more than one patient. For mutation details, see Supplementary Tables S7 and S8.



## Supplementary Figure S13

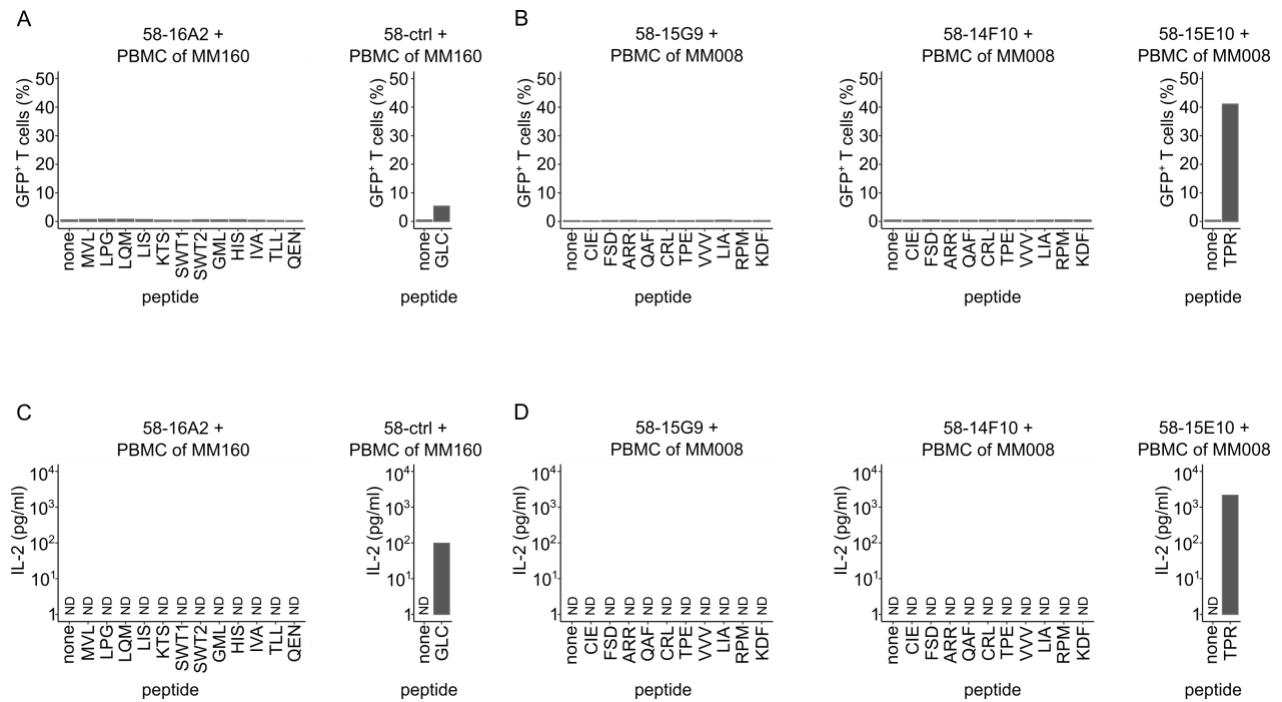

**Supplementary Figure S13. Multiple myeloma-reactive expanded bone marrow T cell clones are not neo-antigen-specific.**

Multiple myeloma-reactive TCR-transgenic cell lines were incubated with potential target peptide-loaded PBMC of the respective patients. (A, B) GFP expression in TCR-recombinant T cells, and (C, D) corresponding IL-2 production. For MM160, an HLA-A\*02:01-restricted EBV epitope-specific TCR (target peptide: GLCTLVAML, named “GLC”) was used as positive control (A, C). For MM008, an HLA-B\*07:02-restricted CMV epitope-specific TCR (target peptide: TPRVTGGGAM, named “TPR”) was used as positive control (B, D).

Data are representative for n=2 experiments.

**Supplementary Figure S14**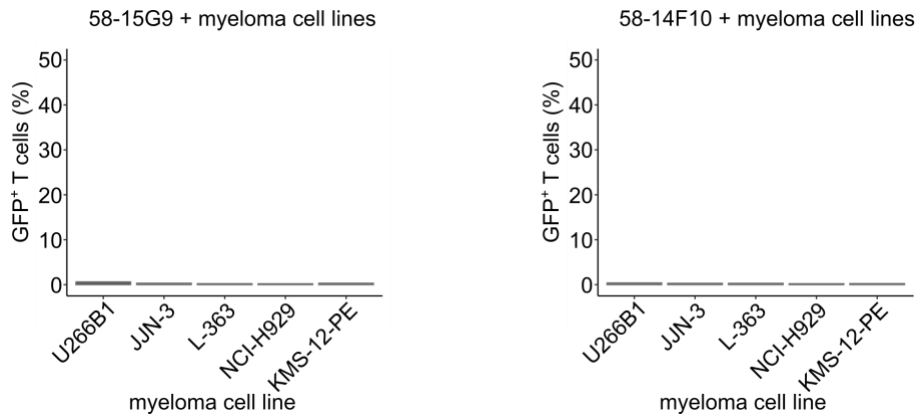**Supplementary Figure S14. TCRs 15G9 and 14F10 do not recognize multiple myeloma cell lines.**

60 000 58-15G9 or 60 000 58-14F10 were incubated with 100 000 cells of the respective cell lines.

The plots show data from three technical replicates within n=1 experiment.

**Supplementary Figure S15**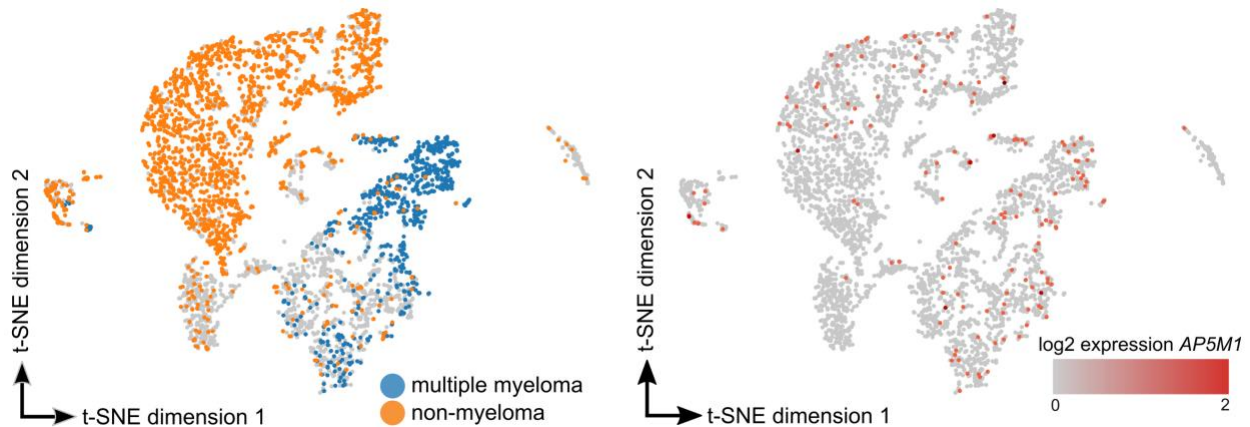**Supplementary Figure S15. Single cell *AP5M1* expression in bone marrow cells of one additional multiple myeloma patient.**

Each data point represents one out of 4379 single bone marrow cells. Left plot: Multiple myeloma cells were identified by expression of CD138, SLAMF7, and monoclonal immunoglobulin light chain in absence of CD45. Non-myeloma cells were selected by CD45 expression and absence of CD138. Right plot: *AP5M1* expression was generally low but not restricted to multiple myeloma cells.

**Supplementary Figure S16**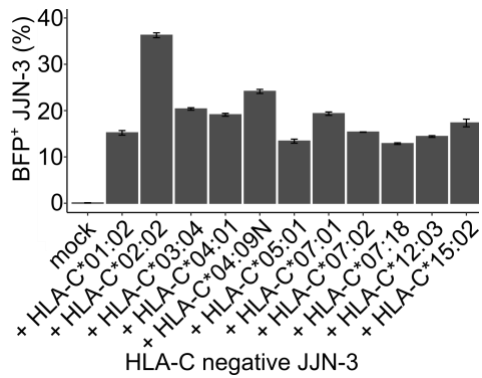**Supplementary Figure S16. Recombinant HLA-C expression in HLA-C-negative JJN-3.**

Selected HLA-C alleles were transiently expressed in HLA-C-negative JJN-3 by nucleofection. Plasmids for nucleofection also carried mTagBFP2 (blue fluorescent protein, BFP), which was measured to indicate HLA expression. The plot shows three technical replicates within n=1 experiment.

**Supplementary Figure S17**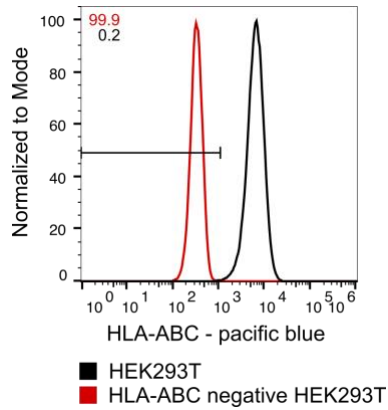**Supplementary Figure S17. HLA-class I deletion in HEK293T**

HLA-class I expression in HEK293T was deleted using CRISPR-Cas-9 technology. Numbers within the plot indicate percentages.
